# Supplementary material for: Synthesis of acremines A, B and F and studies on the bisacremines
Source: publisher site journal article supplement (doi:10.3762/bjoc.15.219), 2019-09-23
Supplement: Additional file 1 [file 1860-5397-15-219-S1.pdf]

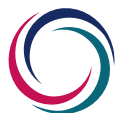

## Supporting Information

for

### Synthesis of acremines A, B and F and studies on the bisacremines

Nils Winter and Dirk Trauner

*Beilstein J. Org. Chem.* **2019**, *15*, 2271–2276. doi:10.3762/bjoc.15.219

## Experimental part

## Table of contents

|                                     |            |
|-------------------------------------|------------|
| <b>General experimental details</b> | <b>S3</b>  |
| <b>Experimental section</b>         | <b>S5</b>  |
| <b>NMR spectra</b>                  | <b>S24</b> |
| <b>Crystallographic data</b>        | <b>S45</b> |
| <b>References</b>                   | <b>S47</b> |

## General experimental details

All reactions were carried out with magnetic stirring, and, if moisture- or air-sensitive, under nitrogen or argon atmosphere using standard Schlenk techniques in oven-dried glassware (140 °C oven temperature). External bath temperatures were used to record all reaction temperatures. Low temperature reactions were carried out in a Dewar vessel filled with acetone/dry ice (−78 °C) or distilled water/ice (0 °C). High temperature reactions were conducted using a heated silicon oil bath in reaction vessels equipped with a reflux condenser or in a sealed flask. Tetrahydrofuran (THF) and diethyl ether (Et<sub>2</sub>O) were distilled over sodium and benzophenone prior to use. Dichloromethane (CH<sub>2</sub>Cl<sub>2</sub>), triethylamine (Et<sub>3</sub>N), diisopropylethylamine (DIPEA) and diisopropylamine (DIPA) were distilled over calcium hydride under a nitrogen atmosphere. All other solvents were purchased from Acros Organics as 'extra dry' reagents. All other reagents with a purity >95% were obtained from commercial sources (Sigma Aldrich, Acros, Alfa Aesar and others) and used without further purification.

**Photochemical reactions** were performed with a medium pressure mercury lamp (150 W) using a Heraeus power supply at room temperature.

**Flash column chromatography** was carried out with Merck silica gel 60 (0.040–0.063 mm).

**Analytical thin-layer chromatography** (TLC) was carried out using Merck silica gel 60 F254 glass-backed plates and visualized under UV light at 254 nm. Staining was performed with ceric ammonium molybdate (CAM) or by oxidative staining with an aqueous basic potassium permanganate (KMnO<sub>4</sub>) solution and subsequent heating.

**NMR spectra** (<sup>1</sup>H NMR and <sup>13</sup>C NMR) were recorded in deuterated chloroform (CDCl<sub>3</sub>) on a Bruker Avance III HD 400 MHz spectrometer equipped with a CryoProbe™, a Varian VXR400 S spectrometer, a Bruker AMX600 spectrometer or a Bruker Avance III HD 800 MHz spectrometer equipped with a CryoProbe™ and are reported as follows: chemical shift  $\delta$  in ppm (multiplicity, coupling constant *J* in Hz, number of protons) for <sup>1</sup>H NMR spectra and chemical shift  $\delta$  in ppm for <sup>13</sup>C NMR spectra. Multiplicities are abbreviated as follows: s = singlet, d = doublet, t = triplet, q = quartet, quint = quintet, br = broad, m = multiplet, or combinations thereof. Residual solvent peaks of CDCl<sub>3</sub> ( $\delta$ H = 7.26 ppm,  $\delta$ C = 77.16 ppm), *d*<sub>4</sub>-MeOH ( $\delta$ H = 3.31 ppm,  $\delta$ C = 49.00 ppm) and *d*<sub>6</sub>-acetone ( $\delta$ H = 2.05 ppm,  $\delta$ C = 29.84 ppm)

were used as an internal reference. NMR spectra were assigned using information ascertained from COSY, HMBC, HSQC and NOESY experiments.

**High-resolution mass spectra** (HRMS) were recorded on a Varian MAT CH7A or a Varian MAT 711 MS instrument by electron impact (EI) or electrospray ionization (ESI) techniques at the Department of Chemistry, Ludwig-Maximilians-University Munich.

**Infrared spectra** (IR) were recorded from 4000  $\text{cm}^{-1}$  to 600  $\text{cm}^{-1}$  on a PERKIN ELMER Spectrum BX II, FT-IR instrument. For detection, a SMITHS DETECTION DuraSampl<sup>IR</sup> II Diamond ATR sensor was used. Samples were prepared as a neat film or a thin powder layer. IR data in frequency of absorption ( $\text{cm}^{-1}$ ) is reported as follows: w = weak, m = medium, s = strong, br = broad or combinations thereof.

**All yields** are isolated unless otherwise specified.

## Experimental section

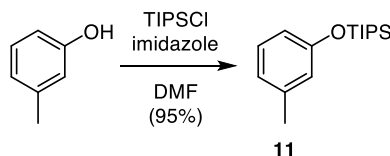

**Silyl ether 11:** TIPSCl (11 mL, 51.87 mmol) was added to a stirred solution of imidazole (7.10 g, 104 mmol) and *m*-cresol (6.25 mL, 59.70 mmol) in DMF (25 mL) and the reaction was stirred at room temperature for 20 h before it was poured into a mixture of Et<sub>2</sub>O (50 mL), hexanes (50 mL) and 1 M aqueous H<sub>2</sub>SO<sub>4</sub> (75 mL). The organic layer was separated and washed three times with 1 M aqueous NaOH and brine. Drying of the solvent over Na<sub>2</sub>SO<sub>4</sub> and removal of the solvent under reduced pressure gave silyl ether **11** (13.1 g, 49.5 mmol, 95%) as a colorless oil.

**Data for 11:** <sup>1</sup>H-NMR (400 MHz, CDCl<sub>3</sub>): δ (ppm) = 7.09 (t, *J* = 7.7 Hz, 1H), 6.77 – 6.64 (m, 3H), 2.30 (s, 3H), 1.32 – 1.19 (m, 3H), 1.10 (d, *J* = 7.3 Hz, 18H). <sup>13</sup>C-NMR (100 MHz, CDCl<sub>3</sub>): δ (ppm) = 156.1, 139.4, 129.1, 121.9, 120.8, 116.9, 21.6, 18.1, 12.8. IR (ATR): ν<sub>max</sub> (cm<sup>-1</sup>) = 2944 (m), 2893 (w), 2867 (m), 1304 (m), 1586 (m), 1487 (s), 1463 (m), 1384 (w), 1368 (w), 1280 (vs), 1165 (s), 1158 (s), 1071 (w), 1006 (m), 996 (w), 956 (s), 920 (w), 882 (s), 859 (w), 813 (s), 776 (s), 734 (w), 688 (vs), 680 (s), 660 (m). HRMS (EI): calc. for C<sub>16</sub>H<sub>28</sub>OSi [*M*]<sup>+</sup>: 264.1909, found: 264.1906.

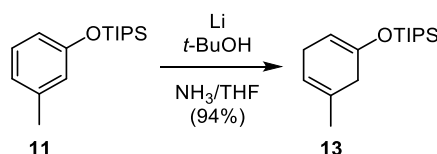

**Silyl enol ether 13<sup>1</sup>:** Li (4.34 g, 6.21 mmol) was added to a solution of THF (285 mL), *t*-BuOH (64 mL) and NH<sub>3</sub> (500 mL) at –78 °C and the mixture was stirred until all metal was dissolved. Silyl ether **11** (27.4 g, 104 mmol) was added slowly and the reaction was stirred at –30 °C for 1 h. The solution was re-cooled to –78 °C and *t*-BuOH (30 mL) was added. After stirring for 30 min at –30 °C the solution was again cooled to –78 °C and NH<sub>4</sub>Cl (32 g) was added portionwise until the blue colour disappeared. The mixture was slowly warmed to room temperature and the ammonia was evaporated under a slight stream of nitrogen. The reaction was diluted with H<sub>2</sub>O and extracted with pentane. The organic phase

was dried over Na<sub>2</sub>SO<sub>4</sub> and the solvent was removed under reduced pressure to give silyl enol ether **13** (26 g, 97.6 mmol, 94%) as a colorless oil.

**Data for 13:** <sup>1</sup>H-NMR (400 MHz, CDCl<sub>3</sub>): δ (ppm) = 5.36 (tp, *J* = 3.2, 1.6 Hz, 1H), 4.85 (tq, *J* = 3.6, 1.3 Hz, 1H), 2.72 (tdq, *J* = 6.3, 3.1, 1.7 Hz, 2H), 2.64 – 2.55 (m, 2H), 1.69 (s, 3H), 1.19 – 1.12 (m, 3H), 1.10 – 1.07 (m, 19H). <sup>13</sup>C-NMR (100 MHz, CDCl<sub>3</sub>): δ (ppm) = 148.2, 131.1, 118.6, 100.1, 35.5, 27.4, 23.1, 18.2, 12.8. IR (ATR): ν<sub>max</sub> (cm<sup>-1</sup>) = 3040 (w), 2944 (w), 2891 (w), 2866 (m), 2822 (w), 1699 (w), 1667 (w), 1463 (w), 1384 (w), 1346 (w), 1240 (w), 1217 (s), 1137 (s), 1071 (w), 1014 (w), 996 (w), 960 (w), 936 (w), 927 (w), 882 (s), 822 (w), 776 (m), 682 (m). HRMS (EI): calc. for C<sub>16</sub>H<sub>30</sub>OSi [*M*]<sup>+</sup>: 266.2066, found: 266.2061.

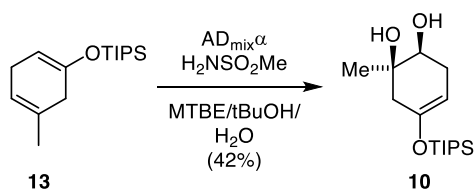

**Diol 10<sup>1</sup>:** Methansulfonamide (2.36 g, 24.84 mmol) was added to a solution of AD<sub>mix</sub>α (50.0 g) in *t*-BuOH (93 mL), MTBE (47 mL) and H<sub>2</sub>O (142 mL) and the resulting solution was stirred for 15 min at room temperature before it was cooled to –8 °C. Silyl enol ether **13** (9.37 g, 35.17 mmol) was added and the reaction was stirred at –8 °C for 7 d, diluted with H<sub>2</sub>O and extracted with EtOAc. The combined organic phases were sequentially washed with 10% aqueous Na<sub>2</sub>S<sub>2</sub>O<sub>3</sub>, saturated NaHCO<sub>3</sub> and brine and dried over MgSO<sub>4</sub>. Removal of the solvent under reduced pressure and purification of the resultant residue by flash column chromatography (EtOAc:hexanes 1:1, R<sub>f</sub> = 0.4) gave diol **10** (4.42 g, 14.71 mmol, 42%, 77% brsm, 25% ee) as a colourless oil.

**Data for 10:** <sup>1</sup>H-NMR (400 MHz, CDCl<sub>3</sub>): δ (ppm) = 4.72 – 4.62 (m, 1H), 3.56 (t, *J* = 5.0 Hz, 1H), 2.39 – 2.12 (m, 6H), 1.22 (s, 3H), 1.16 – 1.09 (m, 3H), 1.08 – 1.01 (m, 18H). <sup>13</sup>C-NMR (100 MHz, CDCl<sub>3</sub>): δ (ppm) = 148.2, 98.2, 72.4, 72.0, 41.7, 29.7, 25.0, 18.1, 12.7. IR (ATR): ν<sub>max</sub> (cm<sup>-1</sup>) = 3409 (m, br), 2946 (m), 2867 (m), 2361 (w), 1715 (m), 1659 (s), 1464 (w), 1377 (w), 1325 (w), 1257 (m), 1201 (m), 1165 (w), 1060 (m), 968 (w), 950 (w), 884 (m), 685 (w). HRMS (EI): calc. for C<sub>16</sub>H<sub>32</sub>O<sub>3</sub>Si [*M*]<sup>+</sup>: 300.2121, found: 300.2119. [*α*]<sub>D</sub><sup>20</sup> = +1.6 (*c* = 0.06, CHCl<sub>3</sub>)

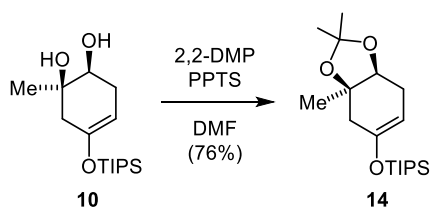

**Acetonide 14<sup>1</sup>:** PPTS (307 mg, 1.21 mmol) was added to a stirred solution of diol **10** (7.30 g, 24.3 mmol) and 2,2-DMP (29.2 mL) in DMF (245 mL) and the solution was stirred for 2 h at room temperature before it was quenched with NEt<sub>3</sub> (18.2 mL). The reaction was diluted with aqueous NaHCO<sub>3</sub> and extracted with Et<sub>2</sub>O. The combined organic phases were washed with brine and dried over Na<sub>2</sub>SO<sub>4</sub>. Removal of the solvent under reduced pressure and purification by flash column chromatography (EtOAc:hexanes 5:95, R<sub>f</sub> = 0.4) gave acetonide **14** (6.28 g, 18.4 mol, 76%) as a colourless oil.

**Data for 14:** <sup>1</sup>H-NMR (400 MHz, CDCl<sub>3</sub>): δ (ppm) = 4.67 (dd, *J* = 2.2, 1.2 Hz, 1H), 3.93 (dt, *J* = 3.4, 1.6 Hz, 1H), 2.46 – 2.33 (m, 1H), 2.14 (dddd, *J* = 14.4, 5.4, 3.6, 1.6 Hz, 1H), 1.84 (ddd, *J* = 16.6, 6.0, 1.5 Hz, 1H), 1.79 – 1.67 (m, 1H), 1.37 (d, *J* = 3.5 Hz, 6H), 1.32 (s, 3H), 1.21 – 1.11 (m, 3H), 1.10 – 1.05 (m, 18H). <sup>13</sup>C-NMR (100 MHz, CDCl<sub>3</sub>): δ (ppm) = 151.2, 107.6, 107.2, 80.1, 77.3, 27.9, 27.7, 26.6, 24.4, 24.3, 18.2, 18.1, 12.7. IR (ATR): ν<sub>max</sub> (cm<sup>-1</sup>) = 2943 (m), 2893 (w), 2867 (m), 2361 (w), 1663 (m), 1464 (w), 1374 (w), 1326 (w), 1297 (w), 1239 (w), 1208 (s), 1191 (w), 1167 (w), 1132 (w), 1086 (s), 1066 (w), 1006 (m), 991 (m), 956 (w), 908 (w), 883 (s), 860 (w), 826 (w), 815 (w), 784 (w), 757 (w), 682 (m), 665 (w). HRMS (EI): calc. for C<sub>16</sub>H<sub>32</sub>O<sub>3</sub>Si [*M*]<sup>+</sup>: 340.2434, found: 340.2424. [α]<sub>D</sub><sup>20</sup> = +24 ° (c = 0.01, CHCl<sub>3</sub>).

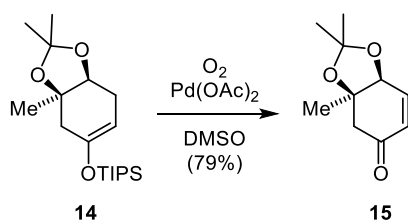

**Ketone 15<sup>1</sup>:** Pd(OAc)<sub>2</sub> (4.14 g, 18.44 mmol) was added to a solution of acetonide **14** (6.28 g, 18.44 mmol) in DMSO (13.7 mL). The reaction was set under vacuum and backfilled with O<sub>2</sub> for three cycles and stirred at room temperature overnight before it was submitted to flash column chromatography (EtOAc:hexanes 15:85, R<sub>f</sub> = 0.2) to give ketone **15** (2.67 g, 14.65 mmol, 79%) as a colorless oil.

**Data for 15:** <sup>1</sup>H-NMR (400 MHz, CDCl<sub>3</sub>): δ (ppm) = 6.75 (dd, *J* = 10.2, 3.7 Hz, 1H), 6.08 (dd, *J* = 10.2, 1.1 Hz, 1H), 4.41 (dd, *J* = 3.8, 1.1 Hz, 1H), 2.84 (d, *J* = 16.2 Hz, 1H), 2.49 (d, *J* = 16.3 Hz, 1H), 1.42 (s, 3H), 1.38 (s, 3H), 1.35 (s, 3H). <sup>13</sup>C-NMR (100 MHz, CDCl<sub>3</sub>): δ (ppm) = 197.1, 143.9, 130.7, 110.3, 80.7, 76.1, 47.5, 28.5, 28.4, 26.1. IR (ATR): ν<sub>max</sub> (cm<sup>-1</sup>) = 3362 (w, br), 2985 (w), 2936 (w), 1681 (s), 1459 (w), 1380 (m), 1312 (w), 1270 (w), 1233 (s), 1212 (m), 1180 (w), 1160 (w), 1144 (w), 1109 (w), 1082 (m), 1046 (s), 1020 (m), 988 (w), 956 (w), 944 (w), 894 (w), 866 (w), 830 (m), 807 (w), 772 (w), 705 (w), 668 (w). HRMS (EI): calc. for C<sub>10</sub>H<sub>14</sub>O<sub>3</sub> [*M*]<sup>+</sup>: 182.0943, found: 182.0935. [ $\alpha$ ]<sub>D</sub><sup>20</sup> = +12 ° (c = 0.01, CHCl<sub>3</sub>).

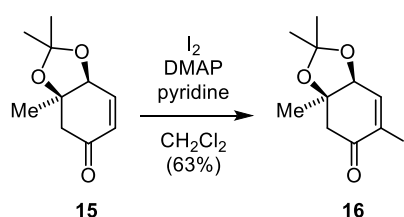

**Vinyl iodide 16:** A solution of iodine (11.18 g, 44.01 mmol) in CH<sub>2</sub>Cl<sub>2</sub> (45 mL) and pyridine (11.83 mL) was added slowly to a solution of ketone **15** (2.67 g, 14.65 mmol) and DMAP (1.80 g, 14.65 mmol) in CH<sub>2</sub>Cl<sub>2</sub> (100 mL) and the resulting solution was stirred for 36 h at room temperature in the dark before it was diluted with CH<sub>2</sub>Cl<sub>2</sub> and washed with a 20% aqueous solution of Na<sub>2</sub>S<sub>2</sub>O<sub>3</sub>, 1 M aqueous HCl and brine. The organic phase was dried over Na<sub>2</sub>SO<sub>4</sub> and the solvent was removed under reduced pressure. Purification of the resulting residue by flash column chromatography (EtOAc:hexanes 1:5, R<sub>f</sub> = 0.3) gave vinyl iodide **16** (2.83 g, 9.18 mmol, 63%, 73% brsm) as a colorless oil).

**Data for 16:** <sup>1</sup>H-NMR (400 MHz, CDCl<sub>3</sub>): δ (ppm) = 7.51 (d, *J* = 3.9 Hz, 1H), 4.41 (d, *J* = 3.8 Hz, 1H), 3.12 (d, *J* = 16.1 Hz, 1H), 2.70 (d, *J* = 16.1 Hz, 1H), 1.46 (d, *J* = 0.8 Hz, 3H), 1.43 (s, 3H), 1.38 – 1.35 (m, 3H). <sup>13</sup>C-NMR (100 MHz, CDCl<sub>3</sub>): δ (ppm) = 190.1, 152.9, 110.9, 106.5, 81.2, 78.6, 45.9, 28.7, 28.5, 26.1. IR (ATR): ν<sub>max</sub> (cm<sup>-1</sup>) = 2987 (w), 2935 (w), 1693 (s), 1599 (w), 1459 (w), 1377 (m), 1327 (w), 1296 (w), 1269 (w), 1235 (s), 1215 (s), 1181 (m), 1145 (w), 1113 (w), 1092 (m), 1053 (m), 1035 (m), 986 (w), 949 (w), 924 (w), 892 (w), 842 (w), 781 (w), 729 (w). HRMS (EI): calc. for C<sub>10</sub>H<sub>13</sub>IO<sub>3</sub> [*M*]<sup>+</sup>: 307.9909, found: 307.9908. [ $\alpha$ ]<sub>D</sub><sup>20</sup> = -17 ° (c = 0.05, CHCl<sub>3</sub>).

The enantiomeric excess was determined using chiral HPLC (chiralpak Od-h) *i*-PrOH:*n*-heptane 0.5:99.5-2:98 (over 30 min, 1 mL/min).



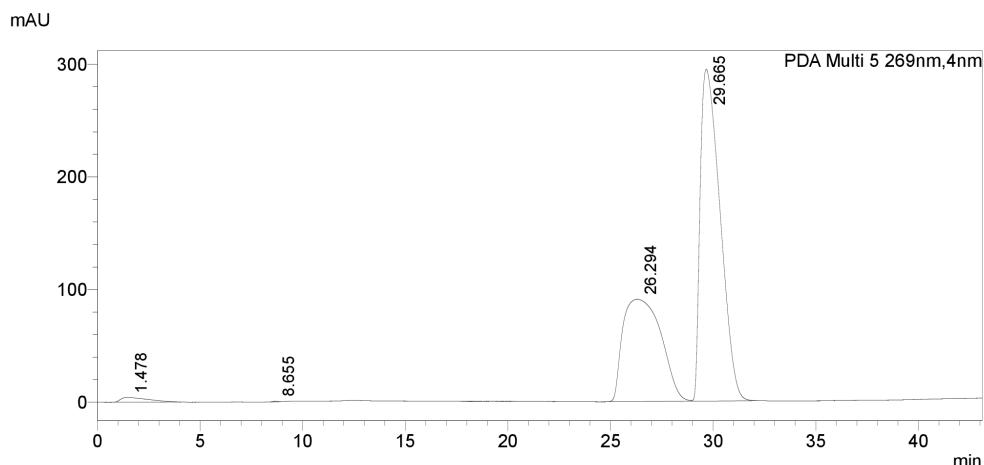

#### <Peak Table>

Detector A Channel 1

| Peak# | Ret. Time | Area | Height | Conc. | Unit | Mark | Name |
|-------|-----------|------|--------|-------|------|------|------|
| Total |           |      |        |       |      |      |      |

PDA Ch5 269nm

| Peak# | Ret. Time | Area     | Height | Conc.  | Unit | Mark | Name |
|-------|-----------|----------|--------|--------|------|------|------|
| 1     | 1.478     | 385248   | 4169   | 1.202  |      |      |      |
| 2     | 8.655     | 8423     | 536    | 0.026  |      | V    |      |
| 3     | 26.294    | 11795277 | 90793  | 36.811 |      |      |      |
| 4     | 29.665    | 19854158 | 294541 | 61.961 |      | V    |      |
| Total |           | 32043107 | 390039 |        |      |      |      |

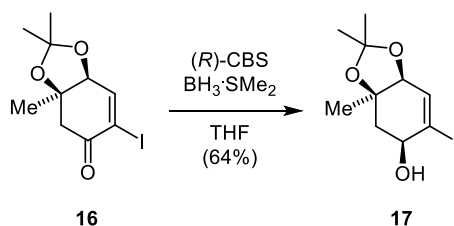

**Allylic alcohol 17:**  $\text{BH}_3 \cdot \text{SMe}_2$  (0.87 mL, 9.18 mmol) was added dropwise to an ice-cooled solution of (R)-CBS catalyst (1.27 g, 4.58 mmol) in THF (126 mL) and the solution was stirred for 15 min at that temperature before a solution of vinyl iodide **16** (2.83 g, 9.18 mmol) in THF (35 mL) was slowly added. The reaction was stirred at 0 °C for 2 h before it was quenched with MeOH and poured into brine and extracted with EtOAc. The combined organic layers were dried over  $\text{Na}_2\text{SO}_4$  and the solvent was removed under reduced pressure. Purification of the resultant residue by flash column chromatography gave allylic alcohol **17** (1.81 g, 5.84 mmol, 64%, 95% ee) as a colorless oil.

**Data for 17:**  $^1\text{H-NMR}$  (400 MHz,  $\text{CDCl}_3$ ):  $\delta$  (ppm) = 6.43 (d,  $J$  = 3.6 Hz, 1H), 4.17 (dd,  $J$  = 3.6, 0.8 Hz, 1H), 4.12 (dt,  $J$  = 9.2, 4.3 Hz, 1H), 3.32 (d,  $J$  = 10.0 Hz, 1H), 2.36 (dd,  $J$  = 14.6, 3.8 Hz, 1H), 2.10 (dd,  $J$  = 14.6, 4.7 Hz, 1H), 1.45 (s, 6H), 1.37 (s, 3H).  $^{13}\text{C-NMR}$  (100 MHz,  $\text{CDCl}_3$ ):  $\delta$  (ppm) = 137.1, 110.7, 107.4, 79.4, 79.1, 72.7, 39.7, 29.2, 28.9, 26.3. IR (ATR):

$\nu_{\max}$  (cm<sup>-1</sup>) = **HRMS (EI)**: calc. for C<sub>10</sub>H<sub>15</sub>IO<sub>3</sub> [M]<sup>+</sup>: 310.0066, found: 310.0056.  $[\alpha]_D^{20} = -105.9$   
(c = 0.03, CHCl<sub>3</sub>)

The enantiomeric excess was determined using chiral HPLC (chiralpak Od-h) *i*-PrOH:*n*-heptane 0.5:99.5-2:98 (over 30 min, 1 mL/min).

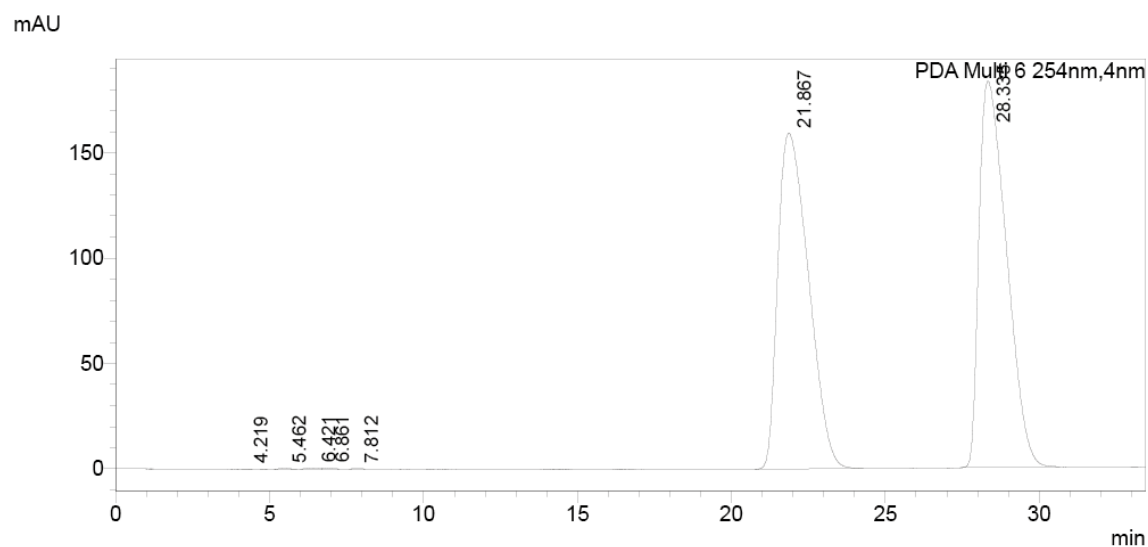

PDA Ch6 254nm

| Peak# | Ret. Time | Area     | Height | Conc. | Unit | Mark | Name |
|-------|-----------|----------|--------|-------|------|------|------|
| 1     | 4.219     | 1224     | 124    | 0.000 |      |      |      |
| 2     | 5.462     | 9684     | 475    | 0.000 |      |      |      |
| 3     | 6.421     | 15975    | 607    | 0.000 |      |      |      |
| 4     | 6.861     | 12144    | 628    | 0.000 |      | V    |      |
| 5     | 7.812     | 4480     | 302    | 0.000 |      |      |      |
| 6     | 21.867    | 11051529 | 159434 | 0.000 |      |      |      |
| 7     | 28.335    | 11362332 | 183375 | 0.000 |      |      |      |
| Total |           | 22457368 | 344946 |       |      |      |      |

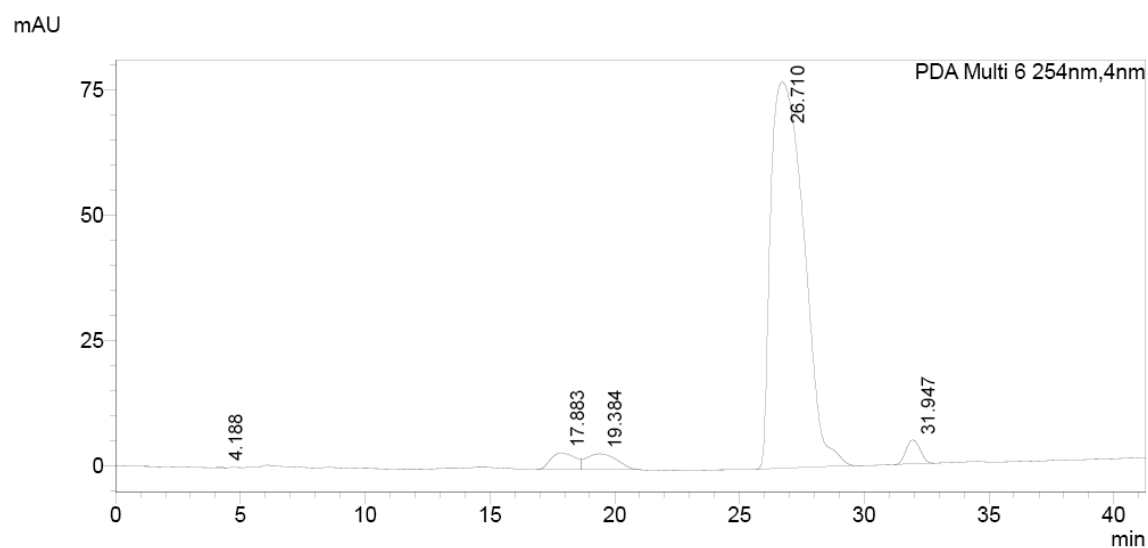

PDA Ch6 254nm

| Peak# | Ret. Time | Area    | Height | Conc. | Unit | Mark | Name |
|-------|-----------|---------|--------|-------|------|------|------|
| 1     | 4.188     | 2991    | 254    | 0.000 |      |      |      |
| 2     | 17.883    | 236756  | 3385   | 0.000 |      |      |      |
| 3     | 19.384    | 278676  | 3243   | 0.000 |      | V    |      |
| 4     | 26.710    | 7118383 | 77141  | 0.000 |      |      |      |
| 5     | 31.947    | 187958  | 4785   | 0.000 |      |      |      |
| Total |           | 7824765 | 88808  |       |      |      |      |

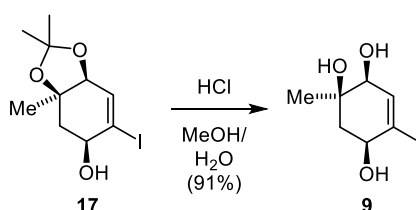

**Triol 9:** Aqueous 1 M HCl (3.7 mL) was added to a stirred solution of vinyl iodide **17** (575 mg, 1.85 mmol) in MeOH (7.4 mL) and the solution was stirred overnight at room temperature in the dark. The reaction mixture was directly submitted to flash column chromatography (EtOAc) to give triol **9** (455 mg, 1.68 mmol, 91%) as a colorless oil.

**Data for 9:** <sup>1</sup>H-NMR (400 MHz, d<sub>4</sub>-MeOH):  $\delta$  (ppm) = 6.40 (dd,  $J$  = 3.7, 0.8 Hz, 1H), 4.04 (tt,  $J$  = 5.4, 1.0 Hz, 1H), 3.73 (dt,  $J$  = 3.7, 0.9 Hz, 1H), 2.05 (dd,  $J$  = 13.6, 5.3 Hz, 1H), 1.97 (ddd,  $J$  = 13.6, 5.3, 0.7 Hz, 1H), 1.20 (s, 3H). <sup>13</sup>C-NMR (100 MHz, d<sub>4</sub>-MeOH):  $\delta$  (ppm) = 141.5, 107.2, 74.8, 73.5, 70.9, 41.8, 25.5. **IR (ATR):**  $\nu_{\text{max}}$  (cm<sup>-1</sup>) = 3270 (s), 2971 (w), 2922 (w), 2863 (w), 1706 (w), 1625 (w), 12449 (w), 1431 (w), 1696 (w), 1374 (w), 1329 (w), 1284 (w), 1253 (m), 1142 (s), 1108 (m), 1066 (s), 1053 (vs), 1036 (s), 1000 (s), 934 (s), 908 (m), 869 (m), 833 (m), 742 (w). **HRMS (ESI):** calc. for C<sub>7</sub>H<sub>10</sub>IO<sub>3</sub> [ $M-H$ ]<sup>-</sup>: 268.9680, found: 298.9684.  $[\alpha]_D^{20}$  = +14.0 ° (c = 0.0043, MeOH).

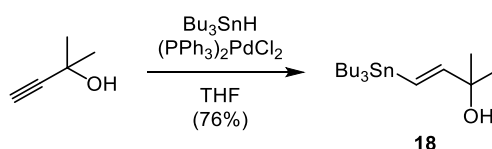

**Vinylstannane 18:** Bu<sub>3</sub>SnH (1.58 mL, 5.96 mmol) was added dropwise to a suspension of 2-methyl-3-butyn-2-ol (0.58 mL, 5.94 mmol) and (PPh<sub>3</sub>)<sub>2</sub>PdCl<sub>2</sub> (83 mg, 0.119 mmol) in THF (17 mL) and the resultant solution was stirred for 1 h at room temperature before it was concentrated under reduced pressure. The resultant residue was purified by flash column chromatography (EtOAc:hexanes 8:92, R<sub>f</sub> = 0.3) to yield vinyl stannane **18** (1.70 g, 4.53 mmol, 76%) as a colorless oil.

**Data for 18:**  $^1\text{H-NMR}$  (400 MHz,  $\text{CDCl}_3$ ):  $\delta$  (ppm) = 6.19 – 5.97 (m, 2H), 1.71 (s, 1H), 1.54 – 1.41 (m, 6H), 1.33 – 1.23 (m, 5H), 0.86 (td,  $J$  = 7.7, 1.6 Hz, 15H).  $^{13}\text{C-NMR}$  (100 MHz,  $\text{CDCl}_3$ ):  $\delta$  (ppm) = 155.7, 122.4, 72.5, 29.5, 29.2, 27.3, 13.8, 9.5. **IR (ATR):**  $\nu_{\text{max}}$  ( $\text{cm}^{-1}$ ) = 3357 (w, br), 2956 (s), 2923 (s), 2871 (w), 2853 (w), 1600 (w), 1521 (w), 1463 (w), 1417 (w), 1374 (m), 1292 (w), 1201 (w), 1147 (w), 1071 (w), 989 (m), 960 (w), 904 (w), 874 (w), 781 (w), 667 (m). **HRMS (EI):** calc. for  $\text{C}_{17}\text{H}_{36}\text{OSn}$  [ $M$ ] $^+$ : 376.1788, found: 376.1789

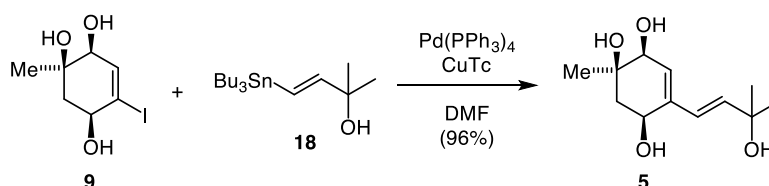

**Acremine F (5):** A solution of triol **9** (430 mg, 1.59 mmol), vinylstannane **18** (1.20 g, 3.19 mmol),  $\text{Pd}(\text{PPh}_3)_4$  (177 mg, 0.153 mmol) and  $\text{CuTc}$  (381 mg, 2.00 mmol) in DMF (37 mL) was stirred at 65 °C overnight in the dark. The reaction was cooled to room temperature, diluted with MeOH and filtered through a pad of celite. Evaporation of the solvent under reduced pressure and purification of the resulting residue by flash column chromatography (EtOAc,  $R_f$  = 0.25) gave acremine F (**5**) (350 mg, 1.53 mmol, 96%) as a colorless oil.

**Data for 5:**  $^1\text{H-NMR}$  (400 MHz,  $\text{d}_4\text{-MeOH}$ ):  $\delta$  (ppm) = 6.19 (d,  $J$  = 16.1 Hz, 1H), 6.08 (d,  $J$  = 16.1 Hz, 1H), 5.63 (d,  $J$  = 2.8 Hz, 1H), 4.35 (t,  $J$  = 3.9 Hz, 1H), 3.95 (d,  $J$  = 2.8 Hz, 1H), 2.09 (dd,  $J$  = 14.3, 3.3 Hz, 1H), 1.85 (dd,  $J$  = 14.3, 4.5 Hz, 1H), 1.33 (s, 3H), 1.32 (s, 3H), 1.27 (s, 3H).  $^{13}\text{C-NMR}$  (100 MHz,  $\text{d}_4\text{-MeOH}$ ):  $\delta$  (ppm) = 139.4, 139.2, 130.8, 127.1, 73.8, 72.0, 71.4, 65.6, 42.0, 30.0, 29.9, 26.5. **IR (ATR):**  $\nu_{\text{max}}$  ( $\text{cm}^{-1}$ ) = 3372 (br), 2971 (s), 2927 (m), 2360 (m), 2168 (w), 2012 (w), 1622 (w), 1373 (m), 1264 (w), 1150 (s), 1072 (m), 1038 (s), 999 (m), 971 (m), 883 (w), 832 (w), 658 (w). **HRMS (ESI):** calc for  $\text{C}_{12}\text{H}_{19}\text{O}_4$  [ $M-H$ ] $^-$ : 227.1289, found: 227.1292 [ $\alpha$ ] $_D^{20}$  =  $-46.6^\circ$  ( $c$  = 0.009,  $\text{CHCl}_3$ ).

$^1\text{H-NMR}$  (400 MHz,  $\text{d}_6\text{-Acetone}$ ):  $\delta$  (ppm) = 6.17 (d,  $J$  = 16.1 Hz, 1H), 6.09 (d,  $J$  = 16.0 Hz, 1H), 5.51 (d,  $J$  = 2.3 Hz, 1H), 4.32 – 4.25 (m, 1H), 4.19 (d,  $J$  = 8.6 Hz, 1H), 4.06 (t,  $J$  = 1.3 Hz, 1H), 3.99 – 3.94 (m, 1H), 3.92 (d,  $J$  = 7.9 Hz, 1H), 3.60 (s, 1H), 2.12 – 2.04 (m, 2H), 1.81 (ddd,  $J$  = 14.4, 4.3, 1.1 Hz, 1H), 1.27 (s, 6H), 1.24 (s, 3H).  $^{13}\text{C-NMR}$  (100 MHz,  $\text{d}_6\text{-Acetone}$ ):  $\delta$  (ppm) = 139.6, 139.0, 130.4, 126.6, 73.2, 71.6, 70.4, 64.8, 41.8, 30.48, 30.45, 27.1.

**Table 1:**  $^1\text{H}$ - and  $^{13}\text{C}$ -NMR chemical shifts in  $d_6$ -acetone of natural<sup>2</sup> vs. synthetic acremine F (5).

| No.  | $^1\text{H}$ -NMR Isolated        | $^1\text{H}$ -NMR Synthetic           | $^{13}\text{C}$ -NMR                   | $^{13}\text{C}$ -NMR                    |
|------|-----------------------------------|---------------------------------------|----------------------------------------|-----------------------------------------|
|      | 500 MHz, $d_6$ -acetone [ppm]     | 400 MHz, $d_6$ -acetone [ppm]         | Isolated 125 MHz, $d_6$ -acetone [ppm] | Synthetic 100 MHz, $d_6$ -acetone [ppm] |
| 1    | 3.95 (d, J = 2.57 Hz, 1H)         | 3.99 – 3.94 (m, 1H)                   |                                        | 73.2                                    |
| 2    | 5.52 (d, J = 2.57 Hz, 1H)         | 5.51 (d, J = 2.3 Hz, 1H)              |                                        | 130.4                                   |
| 3    |                                   |                                       |                                        | 139.0                                   |
| 4    | 4.24–4.31 (m, 1H)                 | 4.32 – 4.25 (m, 1H)                   |                                        | 64.8                                    |
| 5a   | 2.02–2.08 (m, 1H)                 | 2.12 – 2.04 (m, 1H)                   |                                        | 40.6                                    |
| 5b   | 1.81 (dd, J = 14.34, 4.41 Hz, 1H) | 1.81 (ddd, J = 14.4, 4.3, 1.1 Hz, 1H) |                                        |                                         |
| 6    |                                   |                                       |                                        | 71.6                                    |
| 7a   | 6.09 (d, J = 16.18 Hz, 1H)        | 6.09 (d, J = 16.0 Hz, 1H)             |                                        | 139.6                                   |
| 8    | 6.17 (d, J = 16.18 Hz, 1H)        | 6.17 (d, J = 16.1 Hz, 1H)             |                                        | 126.6                                   |
| 9    |                                   |                                       |                                        | 70.4                                    |
| 10   | 1.28 (s, 3H)                      | 1.27 (s, 3H)                          |                                        | 30.45                                   |
| 11a  | 1.28 (s, 3H)                      | 1.27 (s, 3H)                          |                                        | 30.48                                   |
| 12   | 1.24 (s, 3H)                      | 1.24 (s, 3H)                          |                                        | 27.1                                    |
| 1-OH |                                   | 4.19 (d, J = 8.6 Hz, 1H)              |                                        |                                         |
| 4-OH |                                   | 4.06 (t, J = 1.3 Hz, 1H)              |                                        |                                         |
| 6-OH |                                   | 3.92 (d, J = 7.9 Hz, 1H)              |                                        |                                         |
| 9-OH |                                   | 3.60 (s, 1H)                          |                                        |                                         |

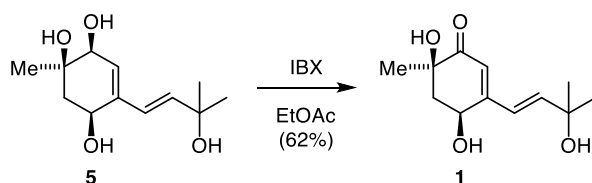

**Acremine A (1):** A suspension of acremine F (**5**) (50 mg, 0.186 mmol) and IBX (104 mg, 0.372 mmol) was vigorously stirred at 80 °C for 3 h. After cooling to room temperature, the solids were removed by filtration and the solvent was evaporated under reduced pressure. Purification by flash column chromatography (EtOAc,  $R_f$  = 0.25) gave acremine A (**1**) (20 mg, 0.115 mmol, 62%) as a colourless solid.

**Data for 1:**  $^1\text{H-NMR}$  (400 MHz,  $\text{CDCl}_3$ ):  $\delta$  (ppm) = 6.59 (d,  $J$  = 16.0 Hz, 1H), 6.38 (d,  $J$  = 16.1 Hz, 1H), 6.00 (s, 1H), 4.61 (t,  $J$  = 5.7 Hz, 1H), 3.70 (s, 1H), 3.44 (s, 1H), 2.36 (dd,  $J$  = 13.7, 4.8 Hz, 1H), 2.22 (dd,  $J$  = 13.7, 6.6 Hz, 1H), 1.38 (s, 6H), 1.34 (s, 3H).  $^{13}\text{C-NMR}$  (100 MHz,  $\text{CDCl}_3$ ):  $\delta$  (ppm) = 200.3, 158.1, 147.1, 124.2, 123.0, 73.1, 71.4, 65.5, 43.8, 29.8, 29.6, 24.8. **IR (ATR):**  $\nu_{\text{max}}$  ( $\text{cm}^{-1}$ ) = 3396 (br), 2971 (s), 1666 (vs), 1634 (s), 1592 (m), 1374 (m), 1253 (m), 1205 (m), 1129 (s), 1063 (m), 1036 (w), 980 (m), 902 (w), 850 (w). **HRMS (EI):** calc for  $\text{C}_{12}\text{H}_{18}\text{O}_4$  [ $M-\text{CH}_3$ ] $^+$ : 226.1200, found: 226.1191.  $[\alpha]_D^{20}$  = +6.0 ° ( $c$  = 0.017,  $\text{CHCl}_3$ ).

**Table 2:**  $^1\text{H}$ - and  $^{13}\text{C}$ -NMR chemical shifts in  $\text{CDCl}_3$  of natural<sup>3</sup> vs. synthetic Acremine A (**1**).

| No. | $^1\text{H-NMR}$ Isolated<br>500 MHz, $\text{CDCl}_3$<br>[ppm] | $^1\text{H-NMR}$ Synthetic<br>400 MHz, $\text{CDCl}_3$<br>[ppm] | $^{13}\text{C-NMR}$<br>Isolated<br>125 MHz, $\text{CDCl}_3$<br>[ppm] | $^{13}\text{C-NMR}$<br>Synthetic<br>100 MHz, $\text{CDCl}_3$<br>[ppm] |
|-----|----------------------------------------------------------------|-----------------------------------------------------------------|----------------------------------------------------------------------|-----------------------------------------------------------------------|
| 1   |                                                                |                                                                 | 200.1                                                                | 200.3                                                                 |
| 2   | 6.00 (brs, 1H)                                                 | 6.00 (s, 1H)                                                    | 123.1                                                                | 123.0                                                                 |
| 3   |                                                                |                                                                 | 157.9                                                                | 158.1                                                                 |
| 4   | 4.63 (m, 1H)                                                   | 4.61 (t, $J$ = 5.7 Hz, 1H)                                      | 65.6                                                                 | 65.5                                                                  |
| 5a  | 2.36 (dd, $J$ = 13.0, 5.1 Hz, 1H)                              | 2.36 (dd, $J$ = 13.7, 4.8 Hz, 1H)                               | 43.9                                                                 | 43.8                                                                  |
| 5b  | 2.10 (dd, $J$ = 13.0, 8.8 Hz, 1H)                              | 2.22 (dd, $J$ = 13.7, 6.6 Hz, 1H)                               |                                                                      |                                                                       |
| 6   |                                                                |                                                                 | 73.1                                                                 | 73.1                                                                  |
| 7   | 6.44 (d, $J$ = 16.0 Hz, 1H)                                    | 6.38 (d, $J$ = 16.1 Hz, 1H)                                     | 124.3                                                                | 124.2                                                                 |

|      |                             |                             |       |       |
|------|-----------------------------|-----------------------------|-------|-------|
| 8    | 6.67 (d, $J = 16.0$ Hz, 1H) | 6.59 (d, $J = 16.0$ Hz, 1H) | 147.1 | 147.1 |
| 9    |                             |                             | 71.4  | 71.4  |
| 10   | 1.35 (s, 3H)                | 1.38 (s, 3H)                | 29.8  | 29.8  |
| 11   | 1.35 (s, 3H)                | 1.38 (s, 3H)                | 29.8  | 29.7  |
| 12   | 1.30 (s, 3H)                | 1.34 (s, 3H)                | 24.1  | 24.8  |
| 1-OH |                             |                             |       |       |
| 4-OH | 2.96 (d, $J = 6.5$ Hz, 1H)  | 3.70 (s, 1H)                |       |       |
| 6-OH | 3.41 (s, 1H)                | 3.44 (s, 1H)                |       |       |

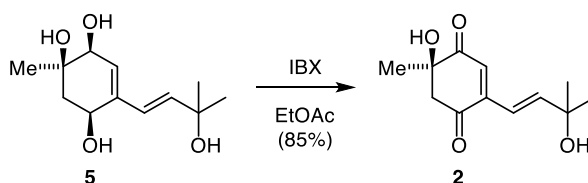

**Acremine B (2):** A suspension of acremine F (**5**) (30 mg, 0.131 mmol) and IBX (149 mg, 0.526 mmol) was vigorously stirred at 80 °C for 9 h. After cooling to room temperature, the solids were removed by filtration and the solvent was evaporated under reduced pressure. Purification by flash column chromatography (EtOAc:hexanes 1:1,  $R_f = 0.25$ ) gave acremine B (**2**) (25 mg, 0.111 mmol, 85%) as a colourless solid.

**Data for 2:**  $^1\text{H-NMR}$  (400 MHz,  $\text{CDCl}_3$ ):  $\delta$  (ppm) = 6.80 (d,  $J = 16.1$  Hz, 1H), 6.75 (s, 1H), 6.53 (dd,  $J = 16.0, 0.7$  Hz, 1H), 3.67 (s, 1H), 3.19 – 2.99 (m, 2H), 1.66 (s, 1H), 1.43 (d,  $J = 0.9$  Hz, 3H), 1.40 (s, 3H), 1.39 (s, 3H).  $^{13}\text{C-NMR}$  (100 MHz,  $\text{CDCl}_3$ ):  $\delta$  (ppm) = 201.8, 195.6, 149.5, 147.9, 130.0, 118.5, 75.3, 71.6, 53.2, 29.7, 27.8. **IR (ATR):**  $\nu_{\text{max}}$  ( $\text{cm}^{-1}$ ) = 3380 (br), 2975 (m), 2931 (w), 1681 (vs), 1634 (m), 159 (m), 1459 (w), 1373 (m), 1254 (m), 1129 (s), 1053 (w), 974 (m), 906 (w), 851 (w), 824 (w), 780 (w), 754 (w), 668 (w). **HRMS (EI):** calc for  $\text{C}_{11}\text{H}_{13}\text{O}_4$  [ $M-\text{CH}_3$ ] $^+$ : 209.0808, found: 209.0824.  $[\alpha]_D^{20} = -64.9^\circ$  ( $c = 0.021$ ,  $\text{CHCl}_3$ ).

**Table 3:**  $^1\text{H}$ - and  $^{13}\text{C}$ -NMR chemical shifts in  $\text{CDCl}_3$  of natural<sup>2</sup> vs. synthetic Acremine B (2).

| No.  | $^1\text{H}$ -NMR Isolated        | $^1\text{H}$ -NMR Synthetic       | $^{13}\text{C}$ -NMR Isolated     | $^{13}\text{C}$ -NMR Synthetic    |
|------|-----------------------------------|-----------------------------------|-----------------------------------|-----------------------------------|
|      | 500 MHz, $\text{CDCl}_3$<br>[ppm] | 400 MHz, $\text{CDCl}_3$<br>[ppm] | 125 MHz, $\text{CDCl}_3$<br>[ppm] | 100 MHz, $\text{CDCl}_3$<br>[ppm] |
| 1    |                                   |                                   | 202                               | 201.8                             |
| 2    | 6.74 (s, 1H)                      | 6.75 (s, 1H)                      | 129.8                             | 130.0                             |
| 3    |                                   |                                   | 148                               | 147.9                             |
| 4    |                                   |                                   | 195.4                             | 195.6                             |
| 5a   | 3.03 (d, $J = 15.16$ Hz, 1H)      | 3.19 – 2.99 (m, 2H)               | 53.1                              | 53.2                              |
| 5b   | 3.11 (d, $J = 15.16$ Hz, 1H)      | 3.19 – 2.99 (m, 2H)               |                                   |                                   |
| 6    |                                   |                                   | 75.1                              | 75.3                              |
| 7    | 6.50 (d, $J = 15.96$ Hz, 1H)      | 6.53 (dd, $J = 16.0, 0.7$ Hz, 1H) | 118.3                             | 118.5                             |
| 8    | 6.80 (d, $J = 15.96$ Hz, 1H)      | 6.80 (d, $J = 16.1$ Hz, 1H)       | 149.4                             | 149.5                             |
| 9    |                                   |                                   | 71.4                              | 71.6                              |
| 10   | 1.37 (s, 3H)                      | 1.40 (s, 3H)                      | 29.5                              | 29.7                              |
| 11a  | 1.37 (s, 3H)                      | 1.39 (s, 3H)                      | 29.5                              | 29.7                              |
| 12   | 1.38 (s, 3H)                      | 1.43 (d, $J = 0.9$ Hz, 3H)        | 27.6                              | 27.8                              |
| 4-OH |                                   | 3.67 (s, 1H)                      |                                   |                                   |
| 9-OH |                                   | 1.66 (s, 1H)                      |                                   |                                   |

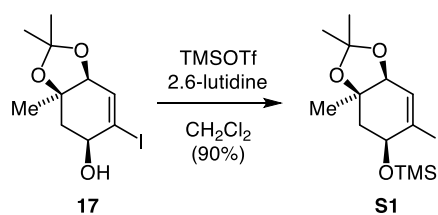

**Silyl ether S1:** 2,6-lutidine (0.20 mL, 1.72 mmol) and TMSOTf (0.16 mL, 0.861 mmol) were sequentially added to an ice-cooled solution of vinyl iodide **17** (107 mg, 0.345 mmol) and the reaction was stirred for 90 min at that temperature before it was quenched with saturated



aqueous  $\text{NH}_4\text{Cl}$  and extracted with  $\text{CH}_2\text{Cl}_2$ . The combined organic layers were dried over  $\text{Na}_2\text{SO}_4$  and concentrated under reduced pressure. Purification of the resulting residue by flash column chromatography (EtOAc:hexanes 4:96) gave silyl ether **S1** (118 mg, 0.309 mmol, 90%) as a colourless oil.

**Data for S1:**  $^1\text{H-NMR}$  (400 MHz,  $\text{CDCl}_3$ ):  $\delta$  (ppm) = 6.57 (dd,  $J$  = 4.9, 1.8 Hz, 1H), 4.04 – 3.97 (m, 1H), 3.90 (dt,  $J$  = 4.9, 1.3 Hz, 1H), 2.07 – 1.89 (m, 2H), 1.46 (d,  $J$  = 0.7 Hz, 3H), 1.37 (d,  $J$  = 0.7 Hz, 3H), 1.32 (d,  $J$  = 0.8 Hz, 3H), 0.21 (s, 9H).  $^{13}\text{C-NMR}$  (100 MHz,  $\text{CDCl}_3$ ):  $\delta$  (ppm) = 133.7, 115.6, 110.0, 78.5, 78.4, 71.2, 42.7, 28.7, 27.3, 23.8, 0.6. IR (ATR): 2963 (w), 2858 (w), 1627 (w), 1458 (w), 1378 (m), 1368 (m), 1251 (s), 1217 (s), 1183 (m), 1123 (m), 1094 (s), 1073 (s), 1032 (m), 992 (w), 949 (w), 916 (w), 887 (vs), 841 (vs), 803 (w), 749 (w). IR (ATR)  $\nu_{\text{max}}$  ( $\text{cm}^{-1}$ ) = HRMS (EI): calc. for  $\text{C}_{12}\text{H}_{20}\text{O}_3\text{Si}$  [ $M-\text{CH}_3$ ] $^+$ : 367.0221, found: 367.0225.  $[\alpha]_D^{20}$  = +109° ( $c$  = 0.017,  $\text{CHCl}_3$ ).

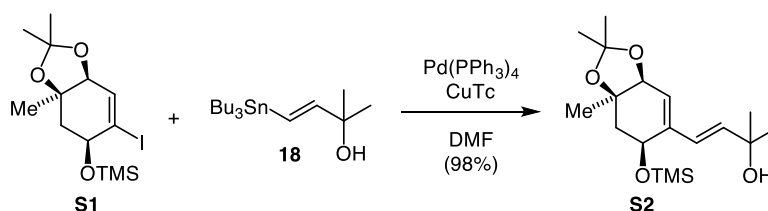

**Diene S2:** A mixture of silyl ether **S1** (178 mg, 0.466 mmol), vinylstannane **18** (349 mg, 0.931 mmol),  $\text{Pd}(\text{PPh}_3)_4$  (51 mg, 0.044 mmol), and  $\text{CuTc}$  (108 mg, 0.566 mmol) in DMF (11 mL) was stirred at 65 °C overnight in the dark. The reaction was diluted with brine and extracted with EtOAc. The combined organic phases were dried over  $\text{Na}_2\text{SO}_4$  and concentrated under reduced pressure. Purification of the resulting residue by flash column chromatography (EtOAc:hexanes 20:80,  $R_f$  = 0.2) gave diene **S2** (156 mg, 0.458 mmol, 98%) as a colourless oil.

**Data for S2:**  $^1\text{H-NMR}$  (400 MHz,  $\text{CDCl}_3$ ):  $\delta$  (ppm) = 6.29 – 6.09 (m, 2H), 5.86 (ddd,  $J$  = 4.7, 1.6, 0.8 Hz, 1H), 4.27 (ddt,  $J$  = 10.7, 5.8, 1.5 Hz, 1H), 4.12 (dd,  $J$  = 4.8, 1.2 Hz, 1H), 1.94 (dd,  $J$  = 5.9, 1.0 Hz, 1H), 1.65 – 1.61 (m, 1H), 1.48 – 1.44 (m, 3H), 1.39 – 1.38 (m, 3H), 1.35 (d,  $J$  = 1.4 Hz, 6H), 1.29 – 1.28 (m, 3H), 0.17 (s, 9H).  $^{13}\text{C-NMR}$  (100 MHz,  $\text{CDCl}_3$ ):  $\delta$  (ppm) = 143.94, 139.8, 124.4, 119.9, 109.2, 78.3, 71.1, 68.6, 42.6, 29.9, 29.9, 28.8, 28.0, 27.3, 27.0, 23.7, 17.7, 13.8, 0.6. IR (ATR):  $\nu_{\text{max}}$  ( $\text{cm}^{-1}$ ) = 3433 (w), 2961 (m), 2932 (w), 2858 (w), 1458 (w), 1369 (m), 1249 (m), 1212 (m), 1179 (w), 1165 (w), 1119 (w), 1088 (m), 1073 (s), 1027

(s), 991 (w), 971 (m), 886 (s), 860 (s), 838 (vs), 749 (m), 725 (w), 683 (w). **HRMS (EI)**: calc for  $C_{18}H_{32}O_4Si$   $[M]^+$ : 340.2064; found: 340.2081.  $[\alpha]_D^{20} = -10.3^\circ$  ( $c = 0.012$ ,  $CHCl_3$ ).

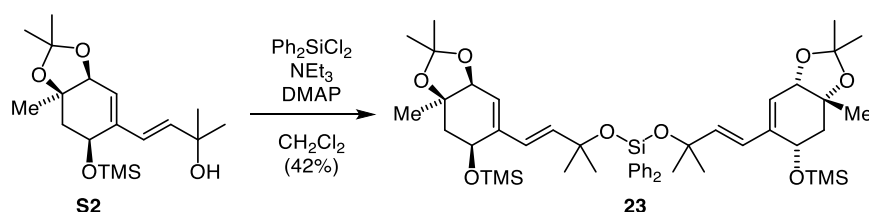

**Siloxane 23**:  $Ph_2SiCl_2$  (25  $\mu$ L, 0.118 mmol) was added to an ice-cooled solution of diene **S2** (80 mg, 0.235 mmol), DMAP (5 mg, 0.041 mmol) and  $NEt_3$  (32  $\mu$ L, 0.238 mmol) in  $CH_2Cl_2$  (1 mL) and the reaction was stirred 10 min at that temperature and 1 h at room temperature before it was quenched with  $H_2O$  and extracted with  $CH_2Cl_2$ . The combined organic layers were dried over  $Na_2SO_4$  and concentrated under reduced pressure. Purification of the resulting residue by flash column chromatography (EtOAc:hexanes 10:90) gave siloxane **23** (42 mg, 0.049 mmol, 42%) as a colourless oil.

**Data for 23**:  $^1H$ -NMR (400 MHz,  $CDCl_3$ ):  $\delta$  (ppm) = 7.73 – 7.59 (m, 4H), 7.35 (dddd,  $J = 15.2, 8.3, 5.9, 1.2$  Hz, 6H), 6.28 – 6.06 (m, 2H), 5.73 (ddd,  $J = 4.8, 1.7, 0.8$  Hz, 1H), 4.19 (dd,  $J = 10.2, 5.9$  Hz, 1H), 4.08 (d,  $J = 4.7$  Hz, 1H), 2.00 – 1.86 (m, 2H), 1.47 (s, 3H), 1.44 (s, 3H), 1.41 (s, 3H), 1.39 (s, 3H), 1.28 (s, 3H), 0.13 (s, 9H).  $^{13}C$ -NMR (100 MHz,  $CDCl_3$ ):  $\delta$  (ppm) = 144.0, 140.2, 137.0, 135.4, 129.6, 127.5, 123.8, 119.2, 109.1, 78.3, 76.8, 75.3, 68.5, 42.6, 30.7, 30.5, 28.8, 27.3, 23.7, 0.6. **IR (ATR)**:  $\nu_{max}$  ( $cm^{-1}$ ) = 2976 (w), 2932 (w), 2858 (w), 1594 (w), 1458 (w), 1430 (w), 1378 (m), 1368 (m), 1342 (w), 1304 (w), 1250 (m), 1240 (m), 1211 (m), 1179 (m), 1164 (m), 1114 (s), 1087 (m), 1072 (s), 1026 (vs), 997 (m), 969 (m), 894 (m), 839 (s), 804 (w), 743 (m), 719 (m), 701 (s). **HRMS (EI)**: calc. for  $C_{48}H_{72}O_8Si_3$   $[M]^+$ : 860.4535, found: 860.4517.  $[\alpha]_D^{20} = -16.8^\circ$  ( $c = 0.008$ ,  $CHCl_3$ ).

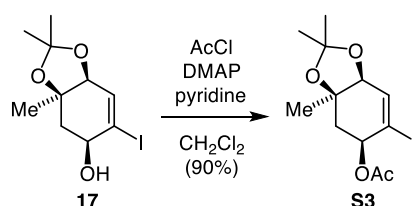

**Acetate S3:** Pyridine (1.40 mL, 16.12 mmol) and AcCl (0.64 mL, 8.06 mmol) were sequentially added to an ice-cooled solution of vinyl iodide **17** (500 mg, 1.61 mmol) and DMAP (20 mg, 0.161 mmol) in CH<sub>2</sub>Cl<sub>2</sub> (13 mL) and the reaction was stirred for 10 min at that temperature and for 3 h at room temperature before it was hydrolysed with H<sub>2</sub>O. The solution was diluted with CH<sub>2</sub>Cl<sub>2</sub> and washed with aqueous HCl (1 M), aqueous saturated NaHCO<sub>3</sub> and brine. The organic phase was dried over Na<sub>2</sub>SO<sub>4</sub> and the solvent was removed under reduced pressure. Purification of the resulting residue by flash column chromatography (EtOAc:hexanes 10:90, R<sub>f</sub> = 0.25) gave acetate **S3** as a colorless oil.

**Data for S3:** <sup>1</sup>H-NMR (400 MHz, CDCl<sub>3</sub>): δ (ppm) = 6.66 (dd, *J* = 4.8, 1.4 Hz, 1H), 5.37 – 5.29 (m, 1H), 3.99 (d, *J* = 4.7 Hz, 1H), 2.14 (s, 3H), 2.06 (dd, *J* = 7.4, 3.8 Hz, 2H), 1.46 (s, 3H), 1.39 (s, 3H), 1.36 (s, 3H). <sup>13</sup>C-NMR (100 MHz, CDCl<sub>3</sub>): δ (ppm) = 170.1, 137.2, 110.3, 105.3, 78.5, 77.8, 71.7, 38.5, 28.6, 27.66, 24.3, 21.4. IR (ATR): ν<sub>max</sub> (cm<sup>-1</sup>) = 2983 (w), 2934 (w), 2860 (w), 1741 (s), 1629 (w), 1456 (w), 1377 (m), 1367 (m), 1211 (vs), 1181 (s), 1116 (m), 1080 (m), 1065 (m), 1028 (s), 990 (m), 955 (m), 914 (m), 877 (m), 842 (w), 819 (w), 800 (w), 738 (w), 655 (w). HRMS (EI): calc. for C<sub>11</sub>H<sub>14</sub>O<sub>4</sub>I [M-CH<sub>3</sub>]<sup>+</sup>: 336.9931, found: 336.9937. [α]<sub>D</sub><sup>20</sup> = -7.2 ° (c = 0.009, CHCl<sub>3</sub>).

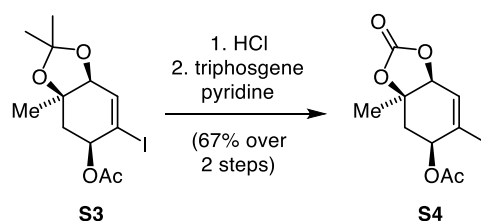

**Carbonate S4:** A solution of acetate **S3** (270 mg, 1.767 mmol) in MeOH (1 mL), THF (1 mL) and aqueous HCl (1 M, 2 mL) was stirred at room temperature overnight. The reaction mixture was directly submitted to flash column chromatography (hexanes:EtOAc 1:1) giving diol **S4.1** (229 mg, 0.734 mmol) as a colorless oil.

A solution of triphosgene (110 mg, 0.379 mmol) in CH<sub>2</sub>Cl<sub>2</sub> (3 mL) was added dropwise to stirred solution of triol **S4.1** (229 mg, 0.734 mmol) and pyridine (0.36 mL, 4.45 mmol) in CH<sub>2</sub>Cl<sub>2</sub> (7.7 mL) at -78 °C. The reaction was stirred for 30 min at -78 °C and overnight at room temperature before it was quenched by the addition of aqueous saturated NH<sub>4</sub>Cl (7 mL). The organic phase was separated and washed with aqueous HCl (1 M), aqueous saturated NH<sub>4</sub>Cl and brine and dried over MgSO<sub>4</sub>. Evaporation of the solvent under reduced pressure and purification of the resulting residue by flash column chromatography

**Data for S4: <sup>1</sup>H-NMR (400 MHz, CDCl<sub>3</sub>):** δ (ppm) = 6.59 (d, *J* = 2.9 Hz, 1H), 5.44 (t, *J* = 4.6 Hz, 1H), 3.84 – 3.77 (m, 1H), 2.14 (d, *J* = 3.6 Hz, 4H), 2.08 (dd, *J* = 14.8, 5.3 Hz, 1H), 1.27 (s, 3H). **<sup>13</sup>C-NMR (100 MHz, CDCl<sub>3</sub>):** δ (ppm) = 169.6, 144.1, 97.0, 73.8, 72.6, 68.8, 39.0, 25.1, 21.1. **IR (ATR):** ν<sub>max</sub> (cm<sup>-1</sup>) = 1789 (s), 1772 (s), 1752 (s), 1730 (s), 1623 (s), 1556 (s), 1461 (s), 1432 (s), 1340 (s), 1385 (s), 1372 (s), 1346 (s), 1306 (s), 1290 (m), 1242 (s), 1206 (vs), 1153 (w), 1110 (m), 1077 (w), 1057 (m), 1018 (vs), 996 (s), 970 (8m), 959 (s), 940 (m), 899 (m), 860 (m), 814 (w), 778 (m), 760 (m), 715 (w). **HRMS (EI):** calc. C<sub>10</sub>H<sub>12</sub>IO<sub>5</sub> for [M+H]<sup>+</sup>: 338.9724, found: 338.9722. [α]<sub>D</sub><sup>20</sup> = -72 ° (c = 0.0125, CHCl<sub>3</sub>).

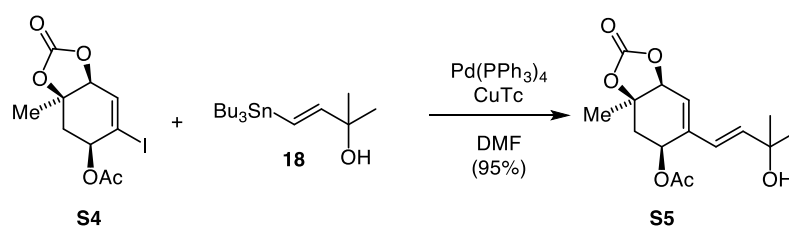

**Data for S5:** <sup>1</sup>H-NMR (400 MHz, CDCl<sub>3</sub>): δ (ppm) = 6.25 (d, *J* = 16.1 Hz, 1H), 5.99 – 5.92 (m, 2H), 5.65 (s, 1H), 4.85 (d, *J* = 4.5 Hz, 1H), 2.58 – 2.51 (m, 1H), 2.07 (s, 3H), 1.89 (dd, *J* = 15.9, 4.1 Hz, 1H), 1.55 (s, 3H), 1.34 (s, 6H). <sup>13</sup>C-NMR (100 MHz, CDCl<sub>3</sub>): δ (ppm) = 171.0, 153.8, 141.4, 140.0, 124.4, 123.6, 79.5, 77.4, 71.1, 62.9, 36.0, 29.9, 29.9, 27.0, 21.4. **IR (ATR):** ν<sub>max</sub> (cm<sup>-1</sup>) = 3482 (w), 2973 (w), 2932 (w), 1782 (s), 1732 (s), 1457 (w), 1426 (w), 1373 (m), 1338 (m), 1304 (w), 1224 (s), 1202 (s), 1187 (s), 1133 (m), 1075 (m), 1017 (vs), 996 (m), 971 (m), 912 (w), 847 (w), 816 (w), 752 (s). **HRMS (EI):** calc. for C<sub>15</sub>H<sub>20</sub>O<sub>6</sub> [*M*]<sup>+</sup>: 296.1254, found: 296.1258. [ $\alpha$ ]<sub>D</sub><sup>20</sup> = –65.9 ° (c = 0.06, CHCl<sub>3</sub>).

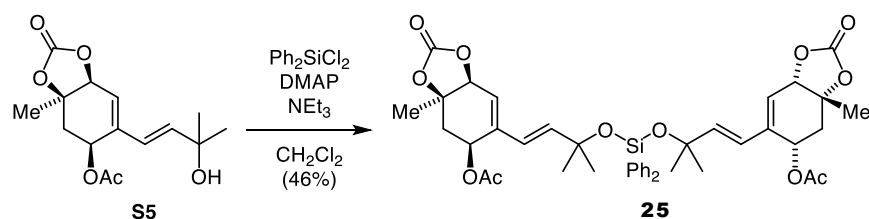

**Siloxane 25:** NEt<sub>3</sub> (18  $\mu$ L, 0.129 mmol) and Ph<sub>2</sub>SiCl<sub>2</sub> (12  $\mu$ L, 0.057 mmol) were sequentially added to an ice-cooled solution of allylic alcohol **S5** (40 mg, 0.135 mmol) in CH<sub>2</sub>Cl<sub>2</sub> (1 mL) and the reaction was stirred for 10 min at that temperature and for 3 h at room temperature. The mixture was diluted with H<sub>2</sub>O and extracted with CH<sub>2</sub>Cl<sub>2</sub>. The organic phase was washed with brine and dried over MgSO<sub>4</sub>. Evaporation of the solvent and purification of the resulting residue by flash column chromatography (EtOAc:hexanes 2:2-1:1) gave siloxane **25** (24 mg, 0.031 mmol, 46%) as a colourless oil.

**Data for 25:** <sup>1</sup>H-NMR (400 MHz, CDCl<sub>3</sub>):  $\delta$  (ppm) = 7.59 (dt,  $J$  = 6.6, 1.5 Hz, 2H), 7.41 – 7.35 (m, 1H), 7.31 (dd,  $J$  = 7.8, 6.5 Hz, 2H), 6.14 (dd,  $J$  = 16.0, 13.2 Hz, 1H), 5.92 – 5.76 (m, 2H), 5.51 (t,  $J$  = 3.6 Hz, 1H), 4.83 (d,  $J$  = 4.3 Hz, 1H), 2.52 (dd,  $J$  = 15.9, 3.1 Hz, 1H), 1.98 (d,  $J$  = 3.0 Hz, 3H), 1.85 (dt,  $J$  = 15.9, 4.5 Hz, 1H), 1.54 (s, 3H), 1.34 (d,  $J$  = 2.4 Hz, 3H), 1.31 (s, 3H). <sup>13</sup>C-NMR (100 MHz, CDCl<sub>3</sub>):  $\delta$  (ppm) = 170.8, 153.9, 141.6, 140.0, 136.2, 135.3, 130.0, 127.7, 124.3, 123.2, 79.6, 77.4, 77.2, 75.1, 62.9, 35.8, 30.4, 30.3, 26.9, 21.3. IR (ATR):  $\nu_{\text{max}}$  (cm<sup>-1</sup>) = 2974 (m), 2156 (w), 1802 (vs), 1737 (s), 1429 (m), 1382 (m), 1234 (s), 114 (m), 1076 (m), 1024 (s), 752 (m), 704 (m). HRMS (EI): calc. for C<sub>42</sub>H<sub>48</sub>O<sub>12</sub>Si [ $M$ ]<sup>+</sup>: 772.2910, found: 772.2913. [ $\alpha$ ]<sub>D</sub><sup>20</sup> = –86.4 ° (c = 0.004, CHCl<sub>3</sub>).

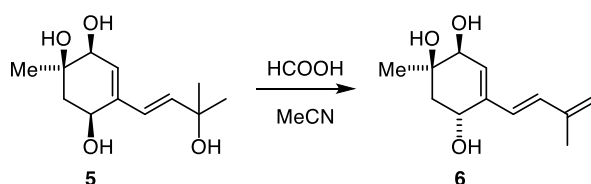

**Acremine T 6:** HCOOH (5 drops) were added to a solution of acremine F (**5**) (20 mg, 0.075 mmol) in MeCN (5 mL) and the resulting solution was stirred at room temperature for 36 h. The reaction mixture was diluted with EtOAc, washed with aqueous saturated NaHCO<sub>3</sub> and brine, dried over MgSO<sub>4</sub> and concentrated under reduced pressure. The resulting residue was purified by flash column chromatography (EtOAc:hexanes 2:1) to give crude acremine T **6** (4.6 mg).

**Data for 6:  $^1\text{H}$ -NMR (400 MHz,  $\text{d}_4\text{-MeOH}$ ):**  $\delta$  (ppm) = 6.60 (d,  $J$  = 16.2 Hz, 1H), 6.19 (d,  $J$  = 16.2 Hz, 1H), 5.68 (d,  $J$  = 3.0 Hz, 1H), 5.02 (br s, 1H), 5.01 (br s, 1H), 4.40 (t,  $J$  = 4.0 Hz, 1H), 3.96 (d,  $J$  = 2.9 Hz, 1H), 2.08 (dd,  $J$  = 14.4, 3.3 Hz, 1H), 1.88 (s, 3H), 1.85 (dd,  $J$  = 14.4, 4.7 Hz, 1H), 1.26 (s, 3H).  **$^{13}\text{C}$ -NMR (100 MHz,  $\text{d}_4\text{-MeOH}$ ):**  $\delta$  (ppm) = 143.5, 139.8, 133.3, 131.7, 129.8, 117.4, 73.9, 72.0, 65.4, 42.0, 26.5, 18.6.

**Table 4:**  $^1\text{H}$ - and  $^{13}\text{C}$ -NMR chemical shifts in  $\text{d}_4\text{-MeOH}$  of natural<sup>4</sup> vs. synthetic Acremine T (6).

| No. | $^1\text{H}$ -NMR Isolated<br>600 MHz, $\text{CDCl}_3$<br>[ppm] | $^1\text{H}$ -NMR Synthetic<br>400 MHz, $\text{CDCl}_3$<br>[ppm] | $^{13}\text{C}$ -NMR<br>Isolated<br>125 MHz, $\text{CDCl}_3$<br>[ppm] | $^{13}\text{C}$ -NMR<br>Synthetic<br>100 MHz, $\text{CDCl}_3$<br>[ppm] |
|-----|-----------------------------------------------------------------|------------------------------------------------------------------|-----------------------------------------------------------------------|------------------------------------------------------------------------|
| 1   |                                                                 |                                                                  | 139.8                                                                 | 139.8                                                                  |
| 2   | 5.68 (d, $J$ =<br>3.0 Hz, 1H)                                   | 5.68 (d, $J$ = 3.0 Hz, 1H)                                       | 131.7                                                                 | 131.7                                                                  |
| 3   | 3.96 (d, $J$ =<br>3.0 Hz, 1H)                                   | 3.96 (d, $J$ = 2.9 Hz, 1H)                                       | 73.9                                                                  | 73.9                                                                   |
| 4   |                                                                 |                                                                  | 72.0                                                                  | 72.0                                                                   |
| 5a  | 1.85 (dd, $J$ =<br>14.3, 4.6 Hz, 1H)                            | 1.85 (dd, $J$ = 14.4, 4.7<br>Hz, 1H)                             | 42.0                                                                  | 42.0                                                                   |
| 5b  | 2.09 (dd, $J$ =<br>14.3, 3.3 Hz, 1H)                            | 2.08 (dd, $J$ = 14.4, 3.3<br>Hz, 1H)                             |                                                                       |                                                                        |
| 6   | 4.40 (dd, $J$ =<br>4.6 Hz, 3,3 Hz<br>1H)                        | 4.40 (t, $J$ = 4.0 Hz, 1H)                                       | 65.4                                                                  | 65.4                                                                   |
| 7   | 6.19 (br d, $J$ =<br>16.0 Hz, 1H)                               | 6.19 (d, $J$ = 16.2 Hz,<br>1H)                                   | 129.8                                                                 | 129.8                                                                  |
| 8   | 6.60 (br d, $J$ =<br>16.0Hz, 1H)                                | 6.60 (d, $J$ = 16.2 Hz,<br>1H)                                   | 133.3                                                                 | 133.3                                                                  |
| 9   |                                                                 |                                                                  | 143.5                                                                 | 143.5                                                                  |
| 10a | 5.02 (br s, 1H)                                                 | 5.02 (br s, 1H)                                                  | 117.4                                                                 | 117.4                                                                  |
| 10b | 5.01 (br s, 1H)                                                 | 5.01 (br s, 1H)                                                  |                                                                       |                                                                        |
| 11  | 1.88 (s, 3H)                                                    | 1.88 (s, 3H)                                                     | 18.6                                                                  | 18.6                                                                   |
| 12  | 1.26 (s, 3H)                                                    | 1.26 (s, 3H)                                                     | 26.5                                                                  | 26.5                                                                   |



# NMR Spectra

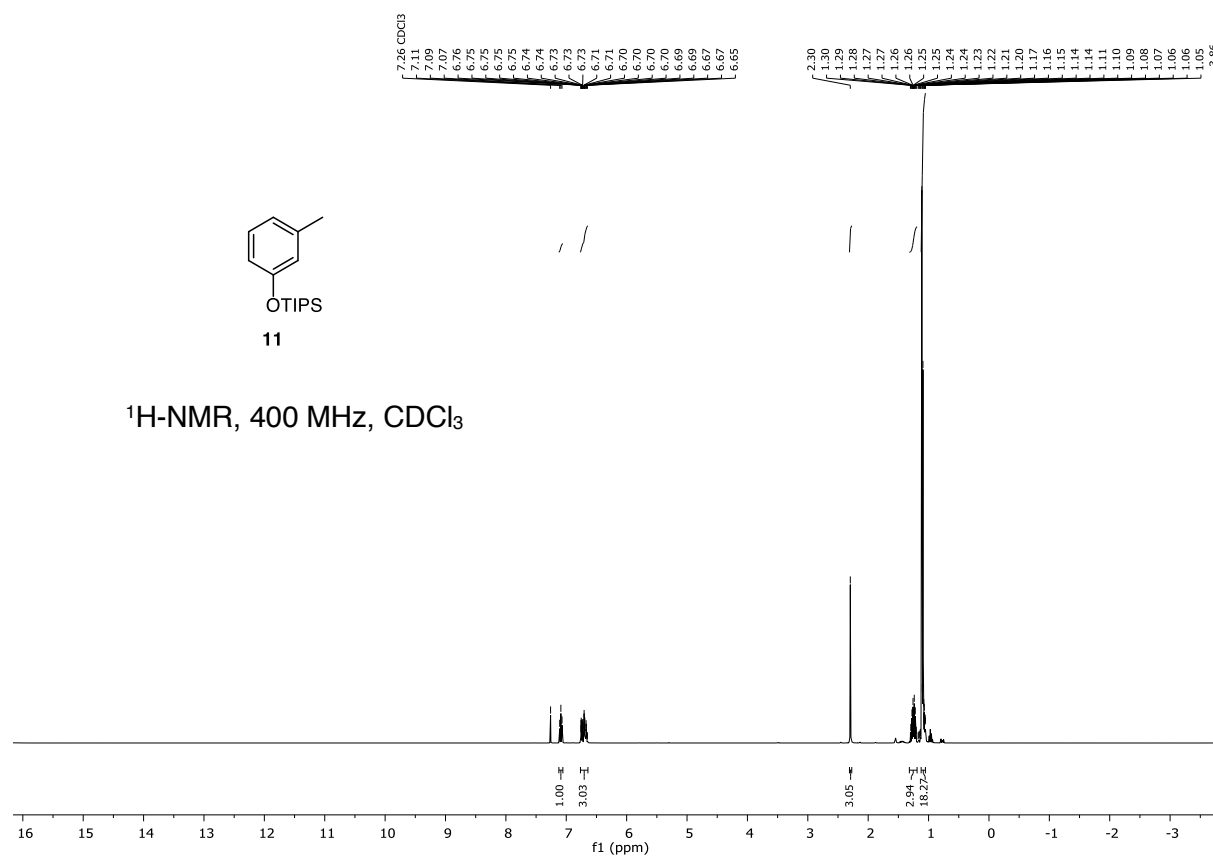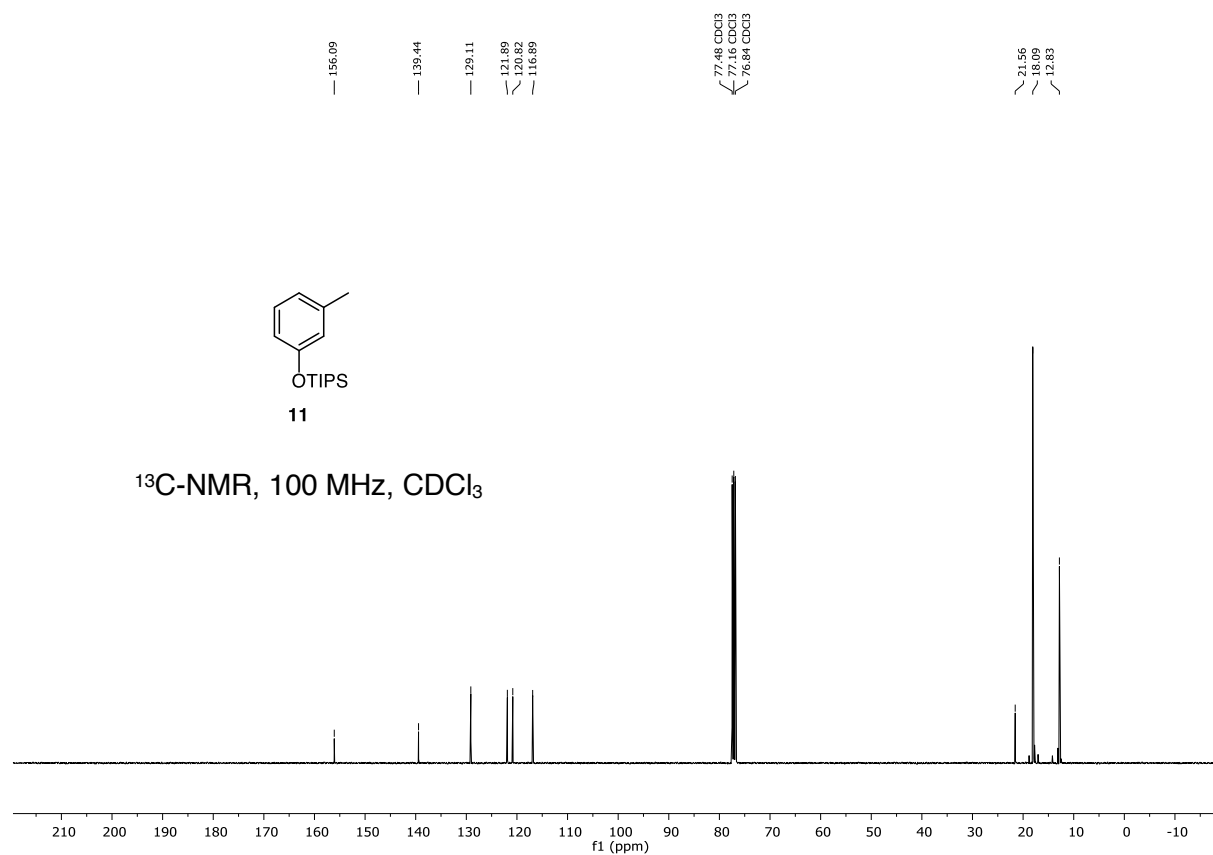



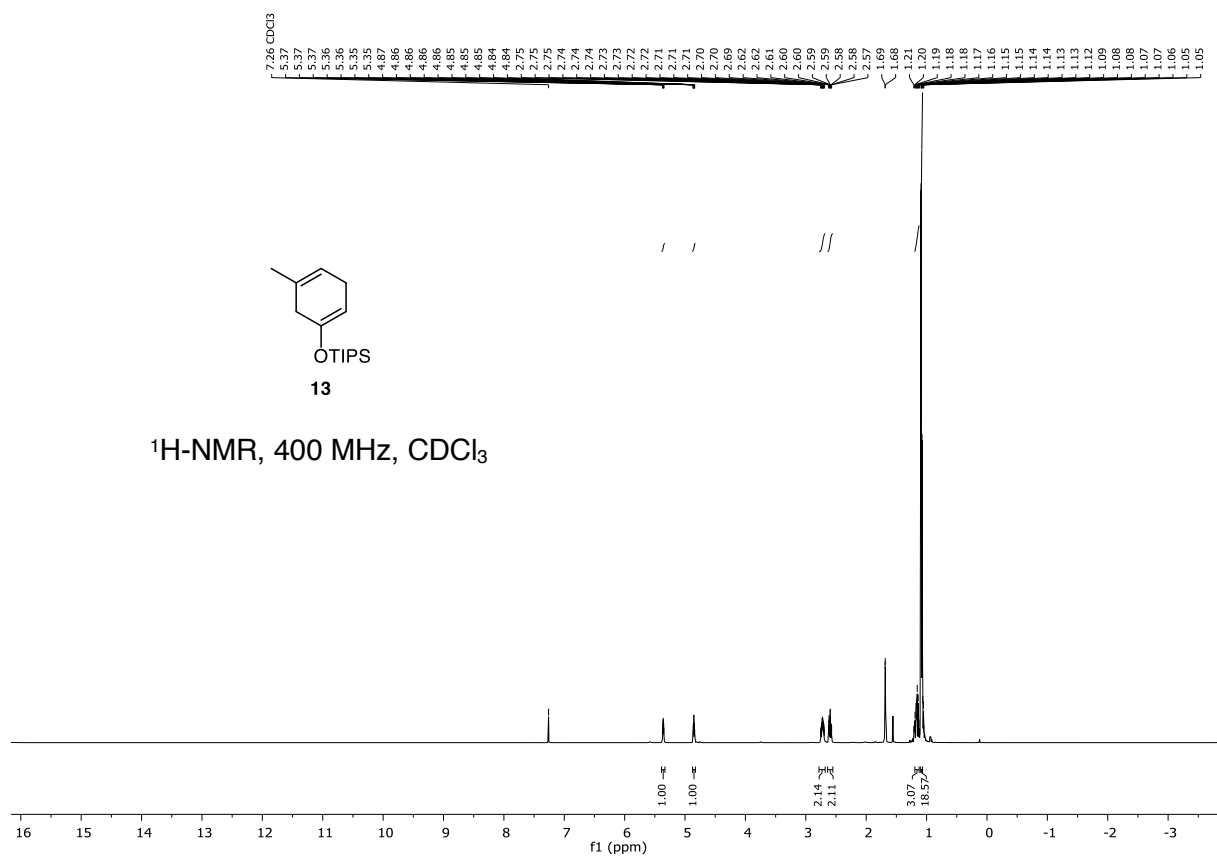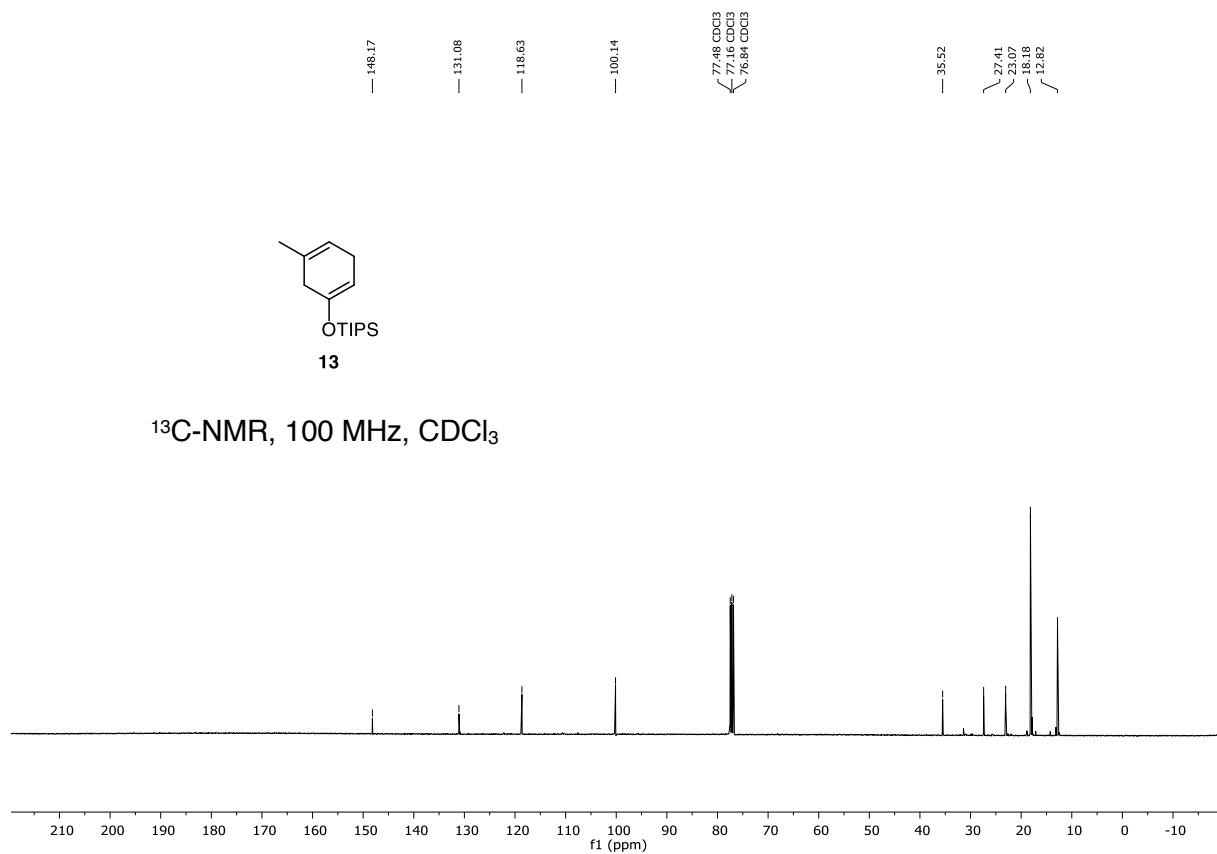

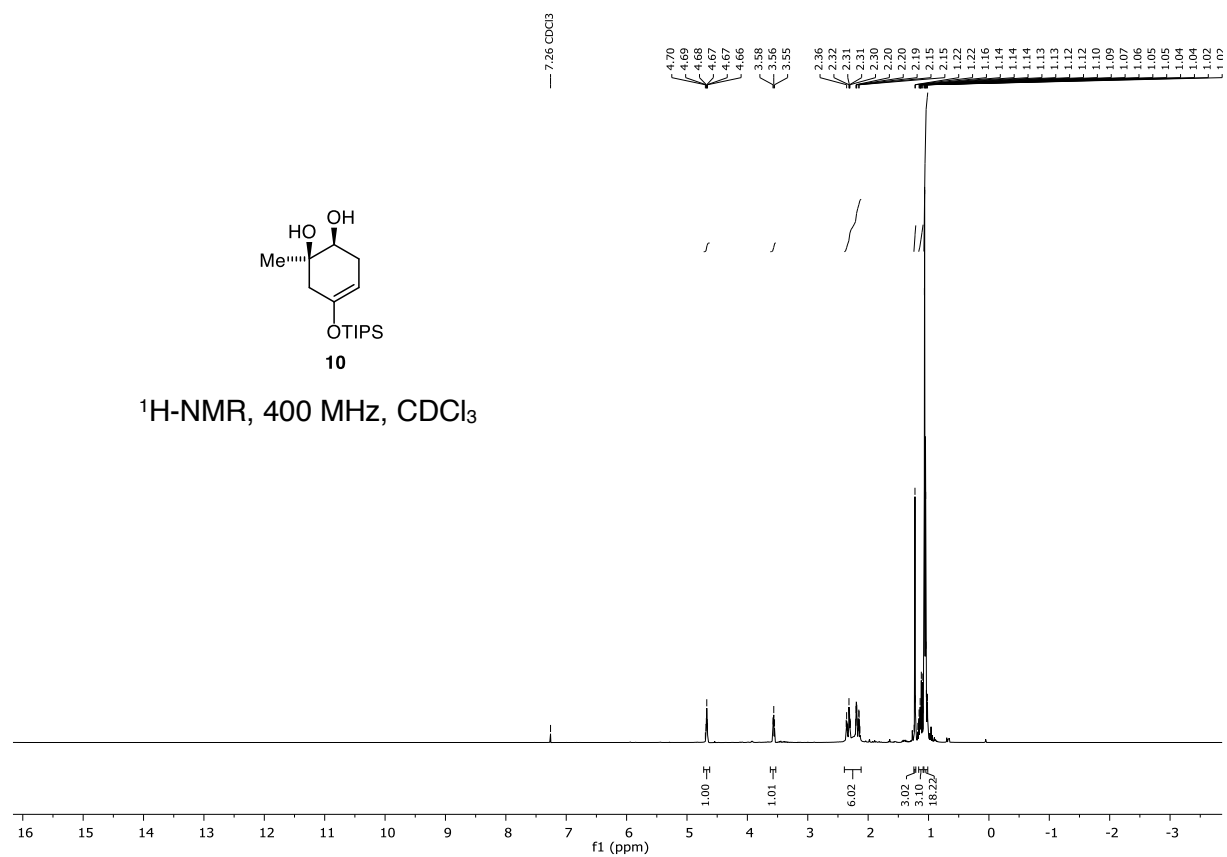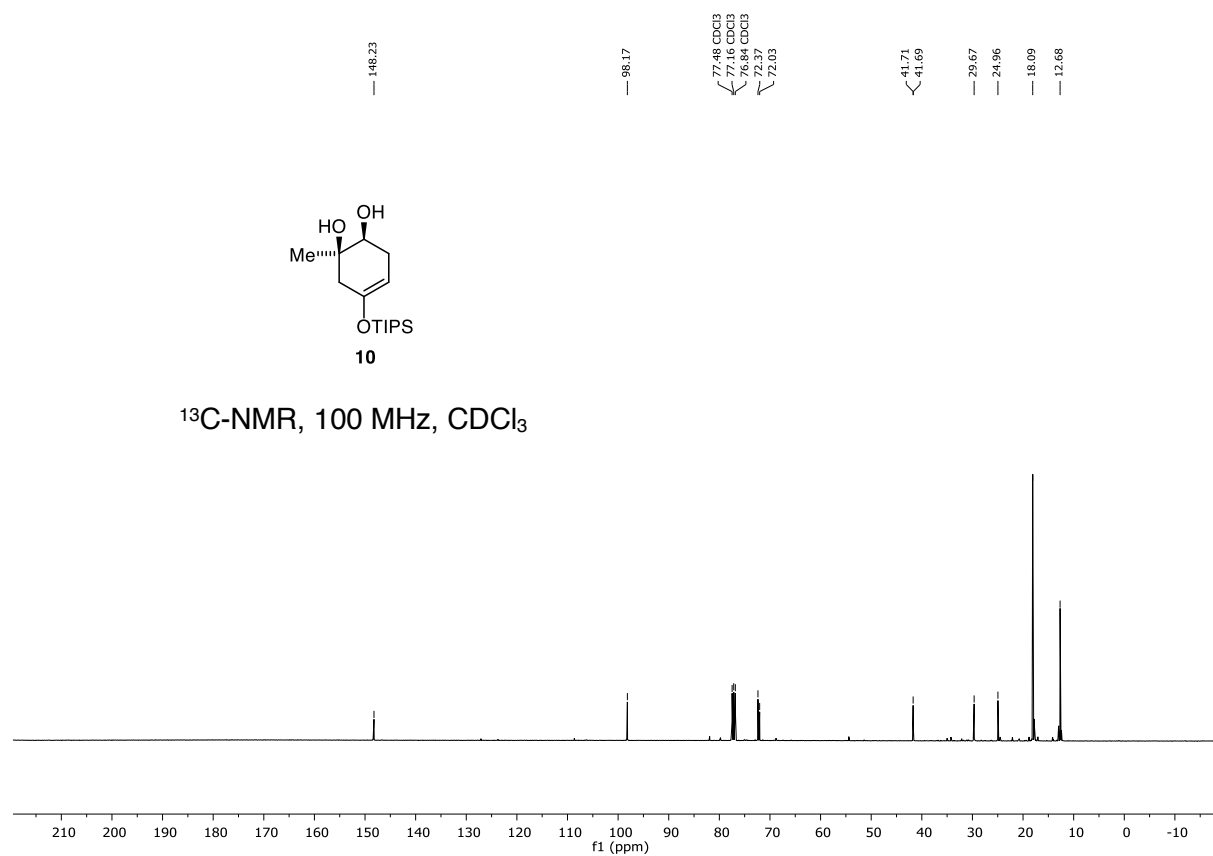

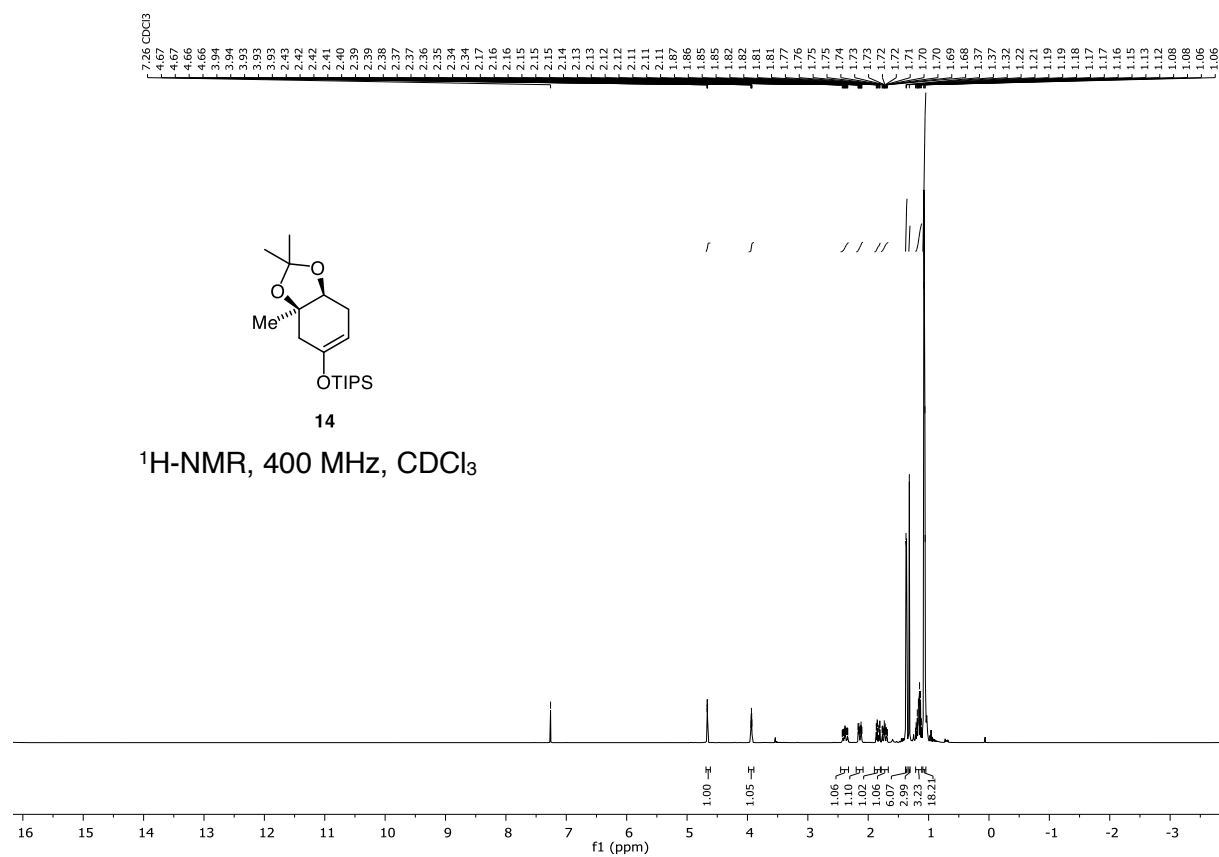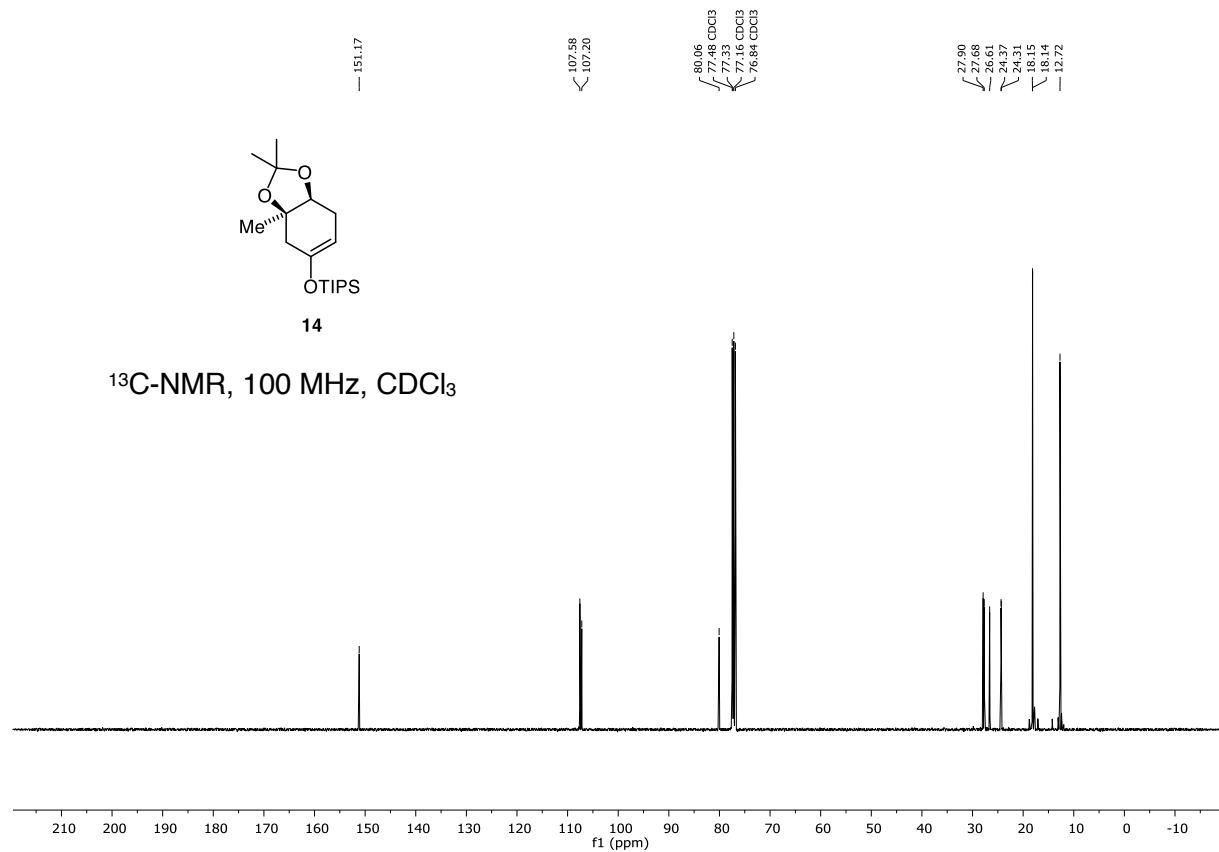

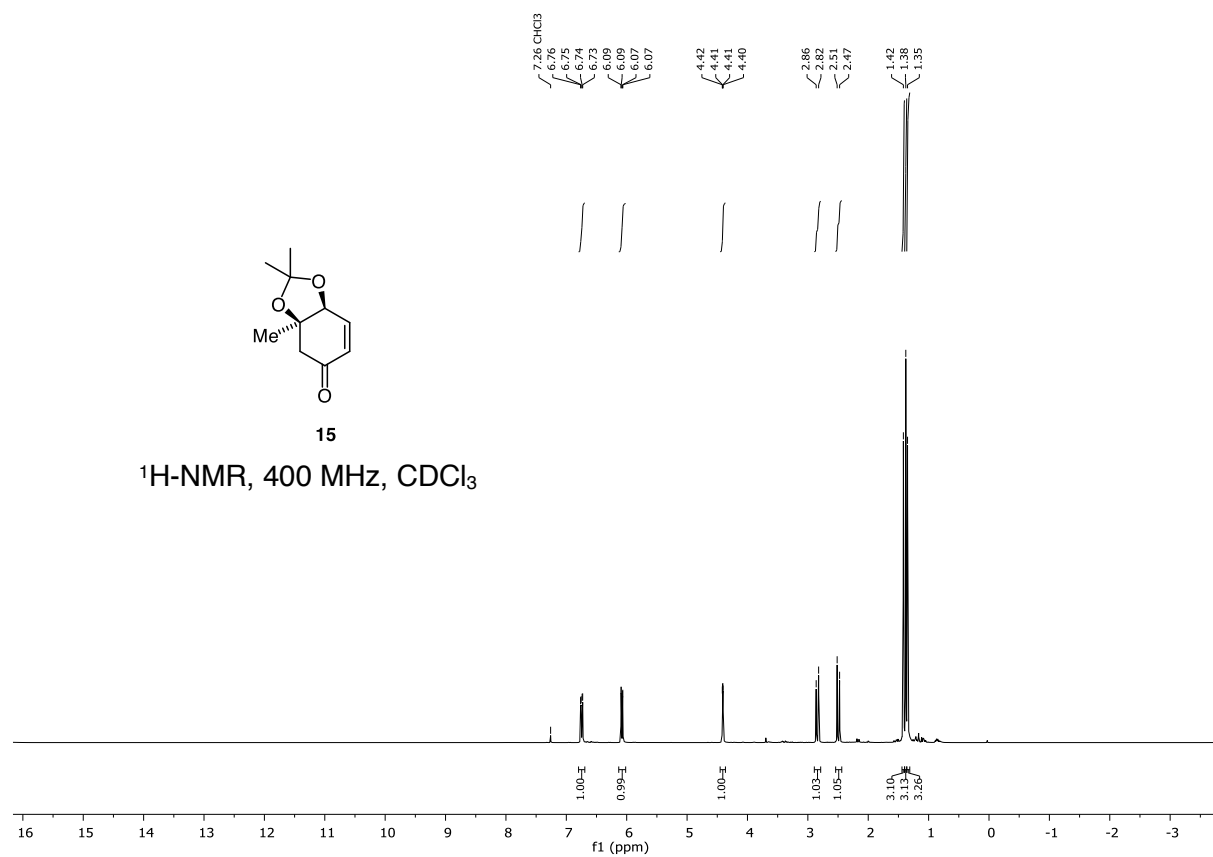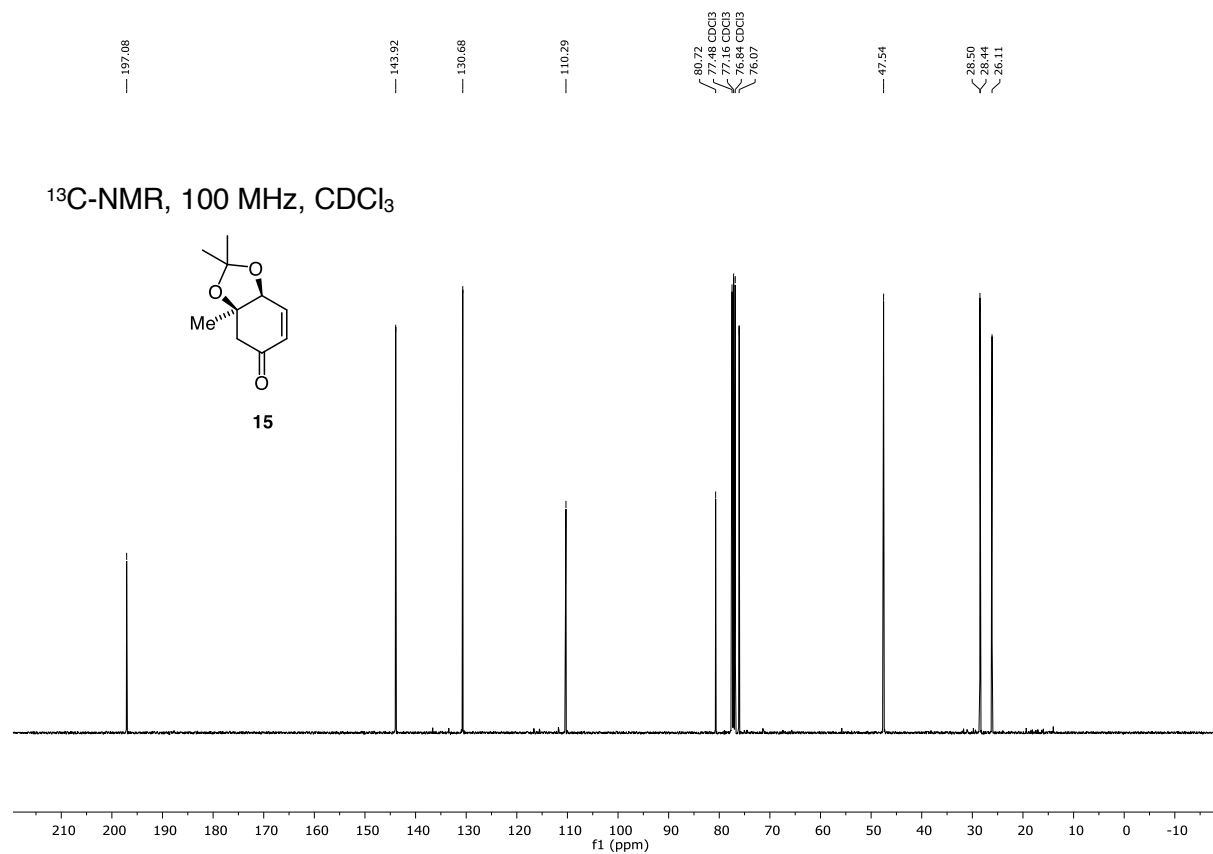

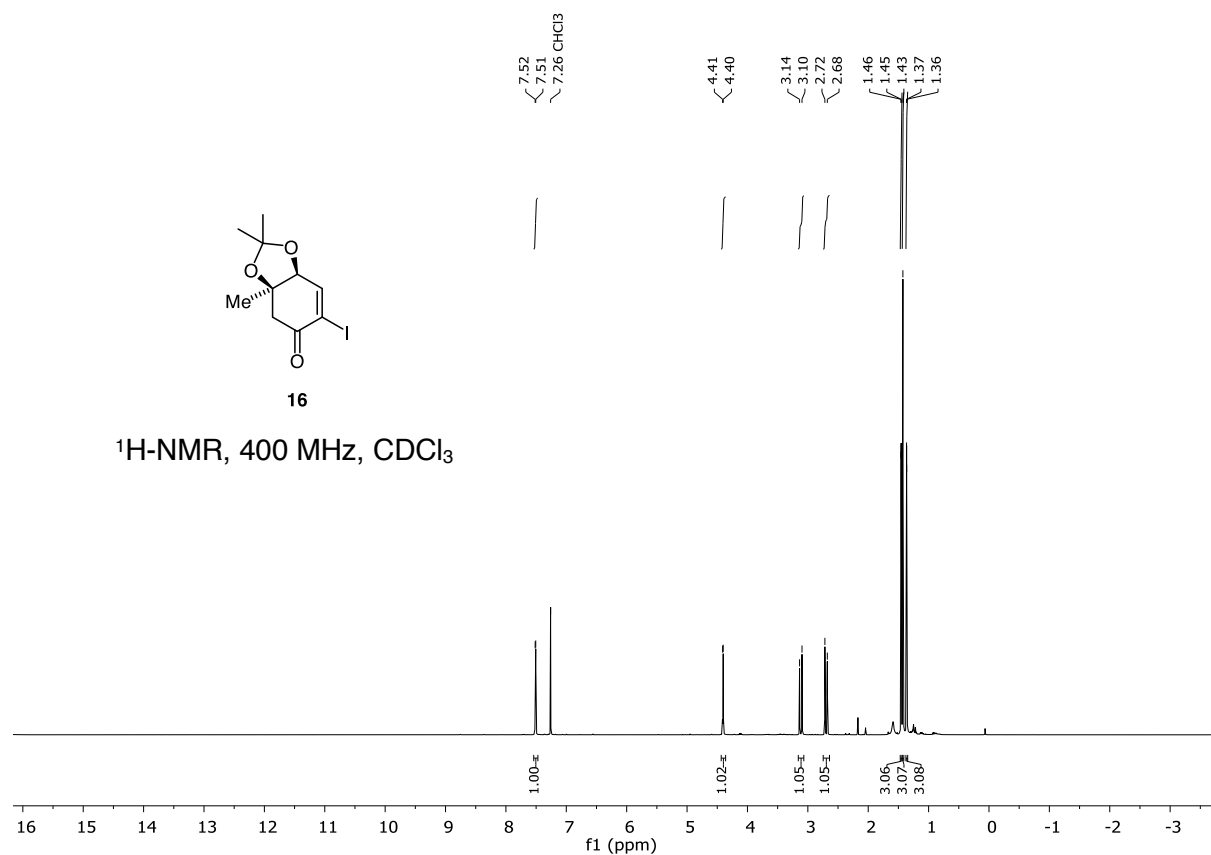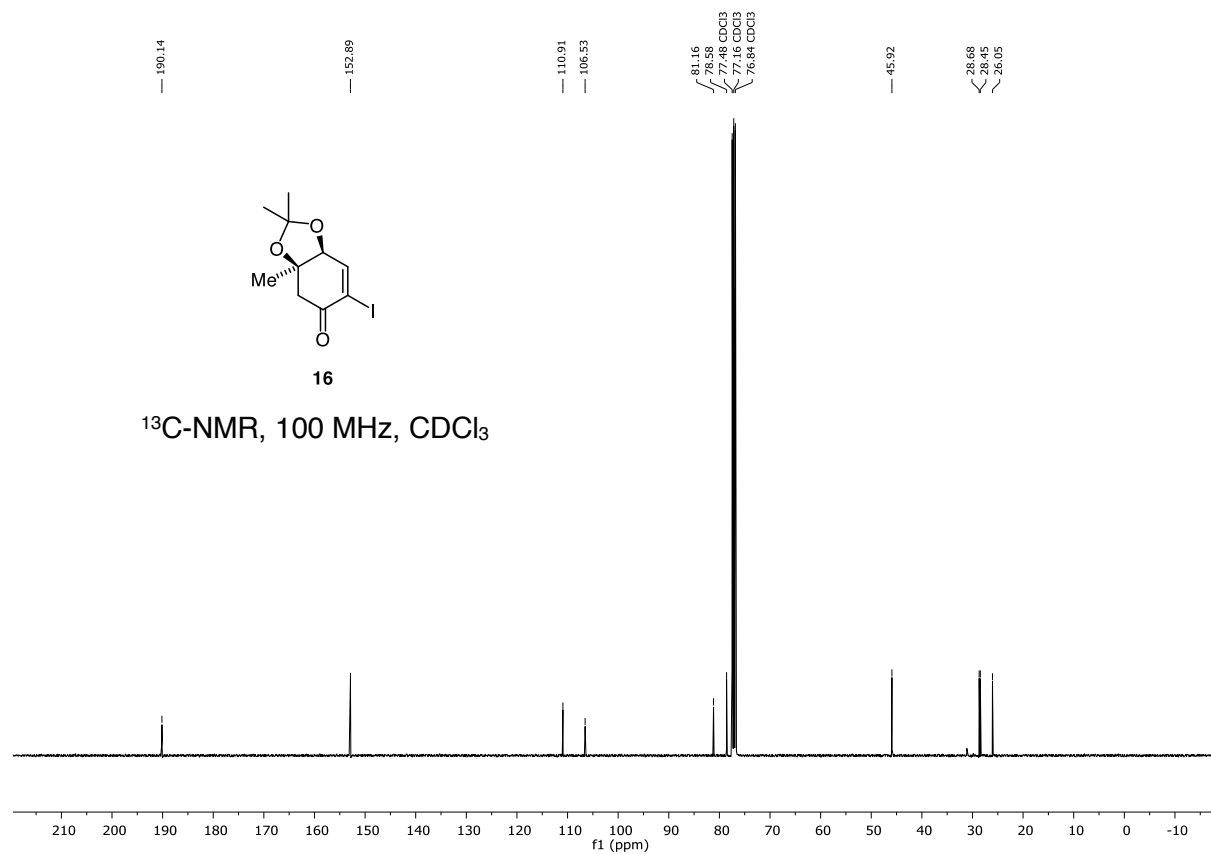

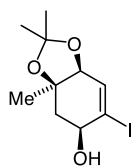

17

$^1\text{H}$ -NMR, 400 MHz,  $\text{CDCl}_3$

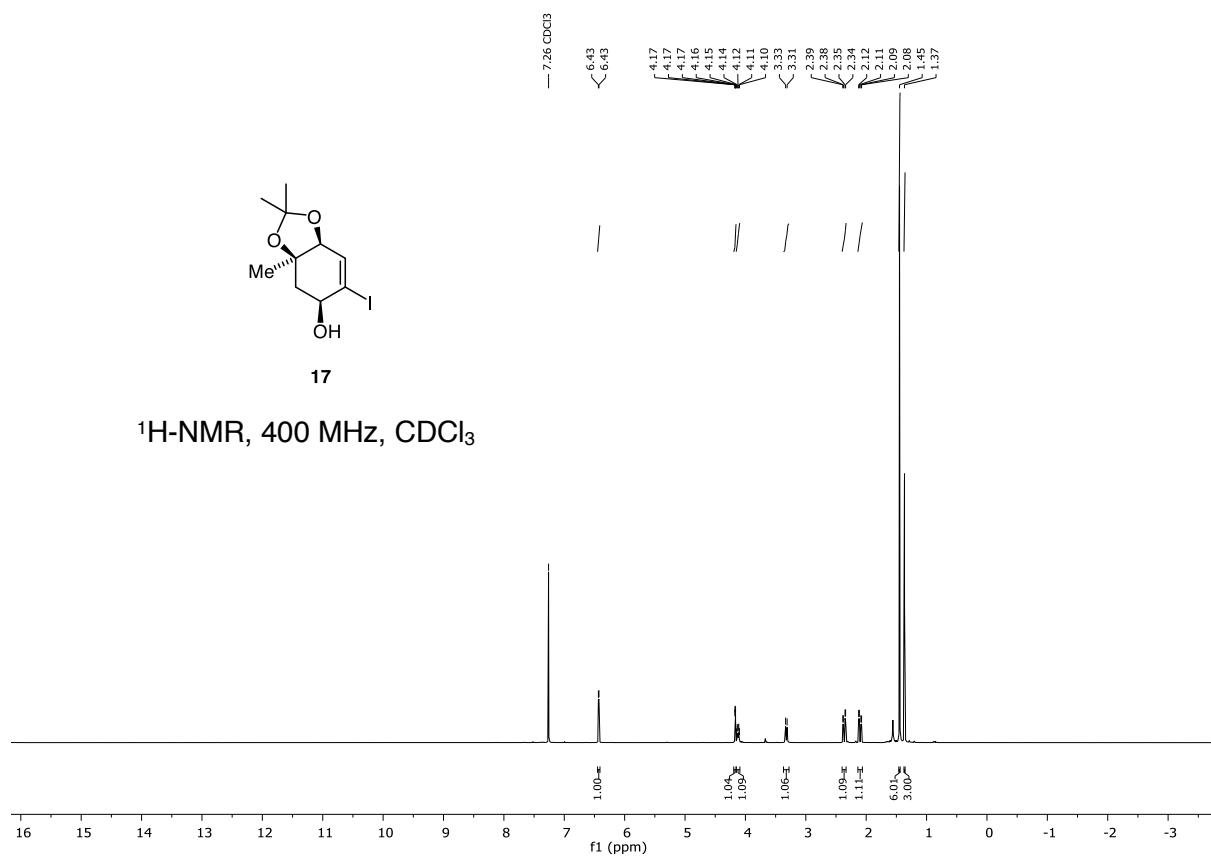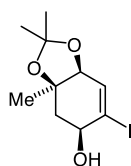

17

$^{13}\text{C}$ -NMR, 100 MHz,  $\text{CDCl}_3$

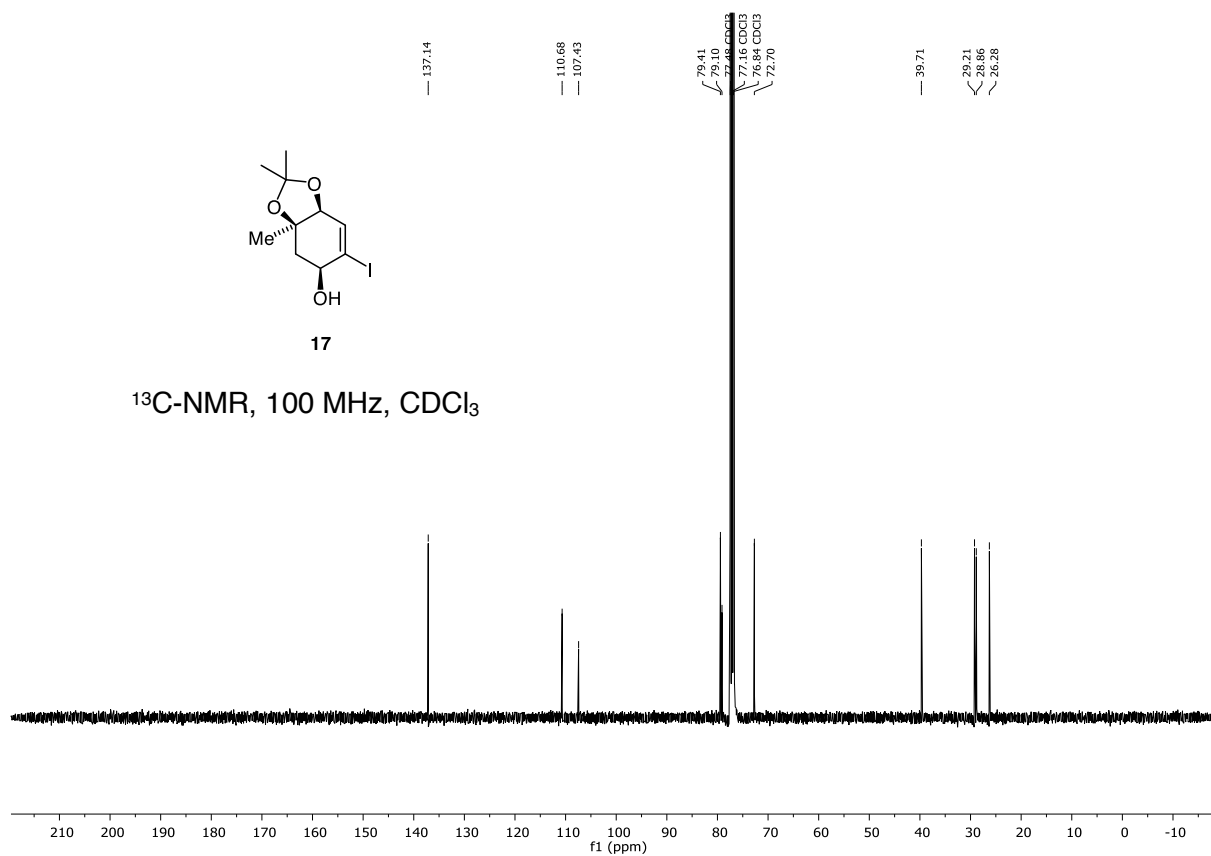

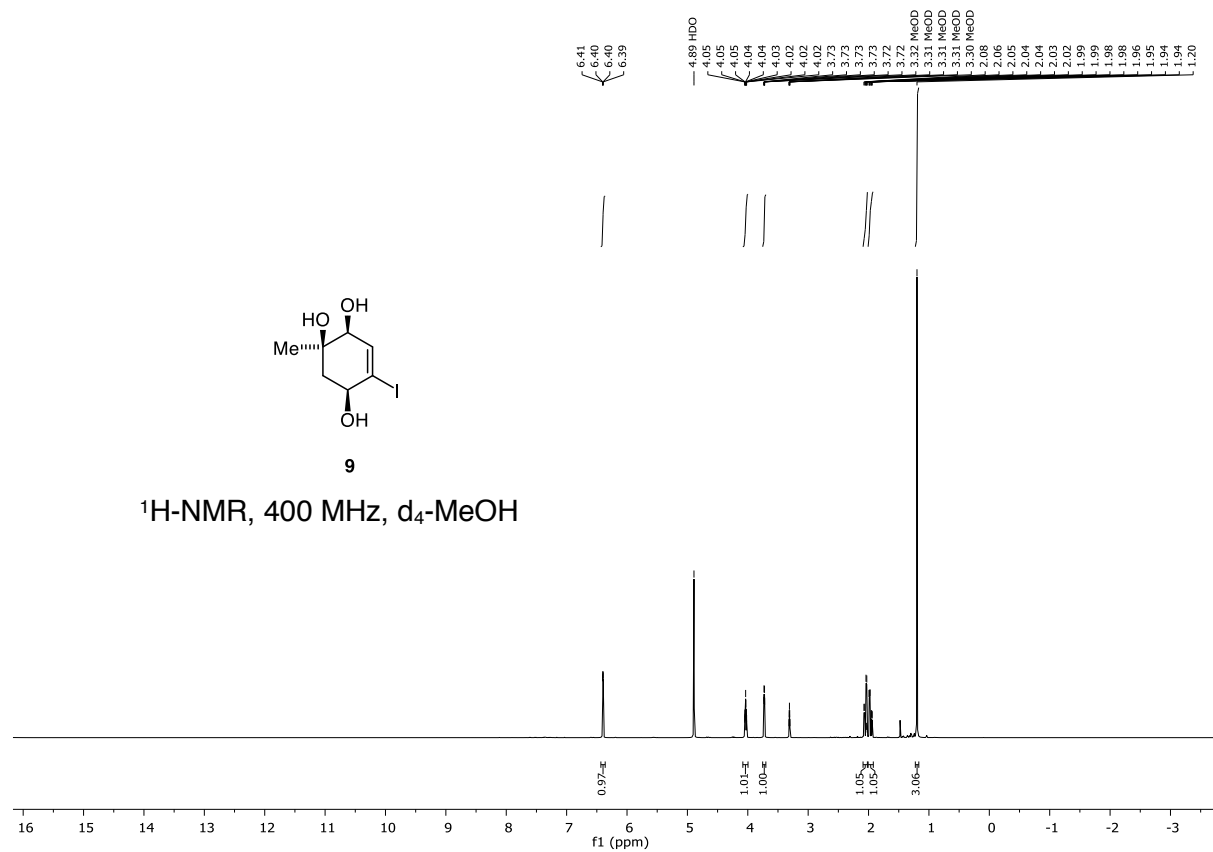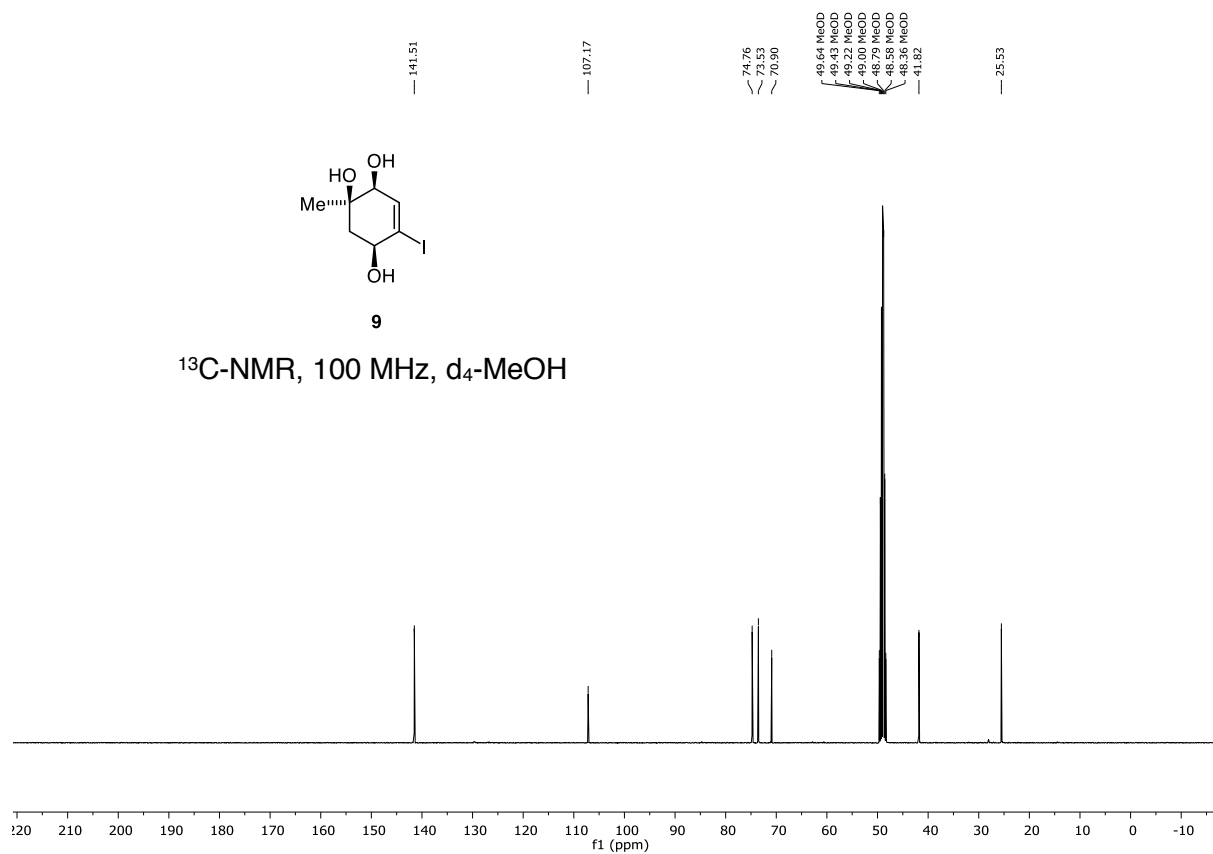





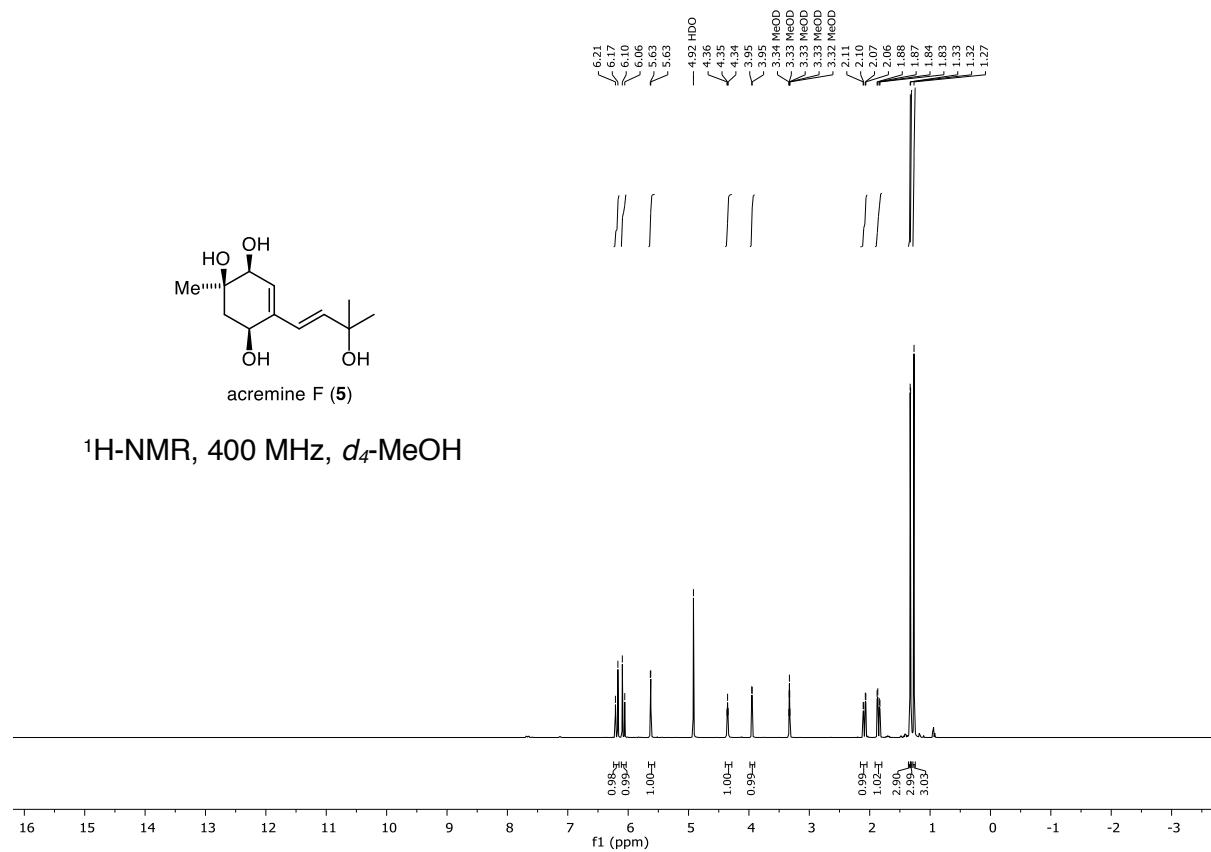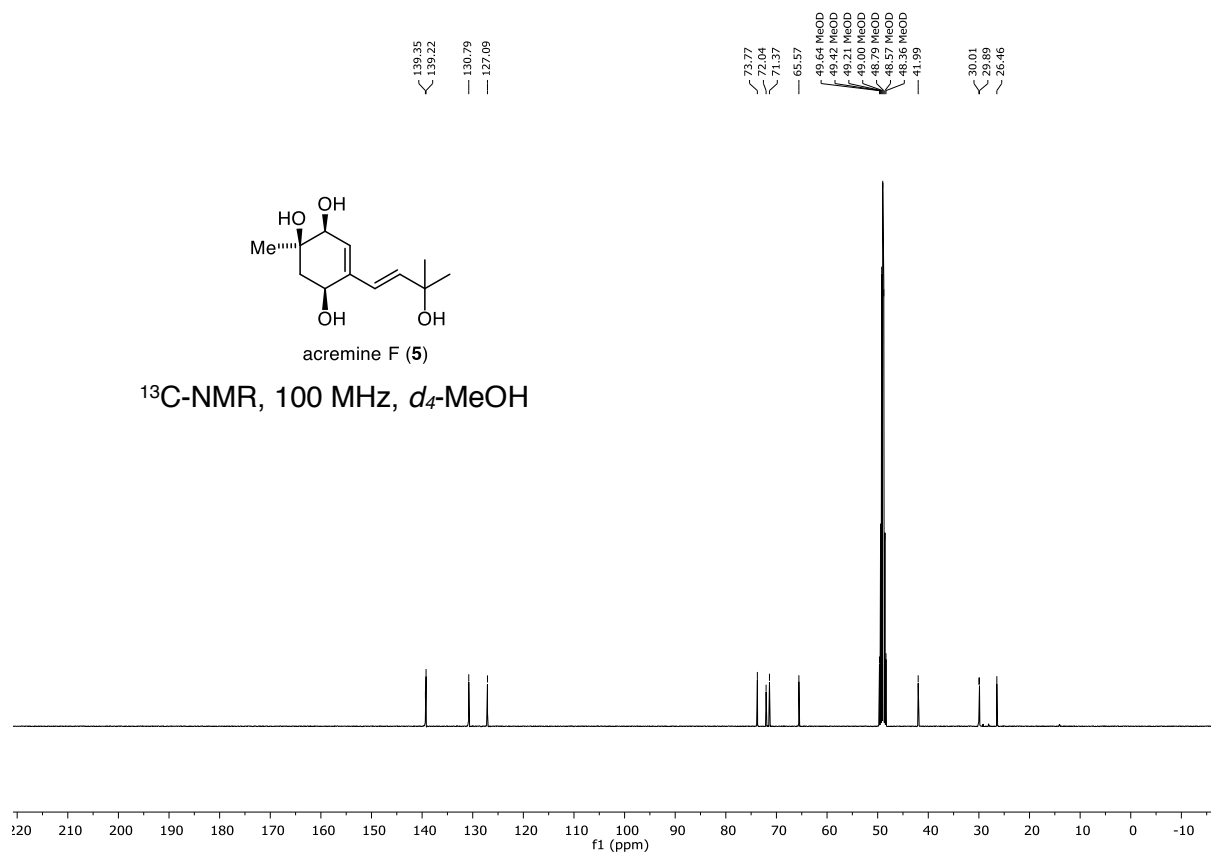



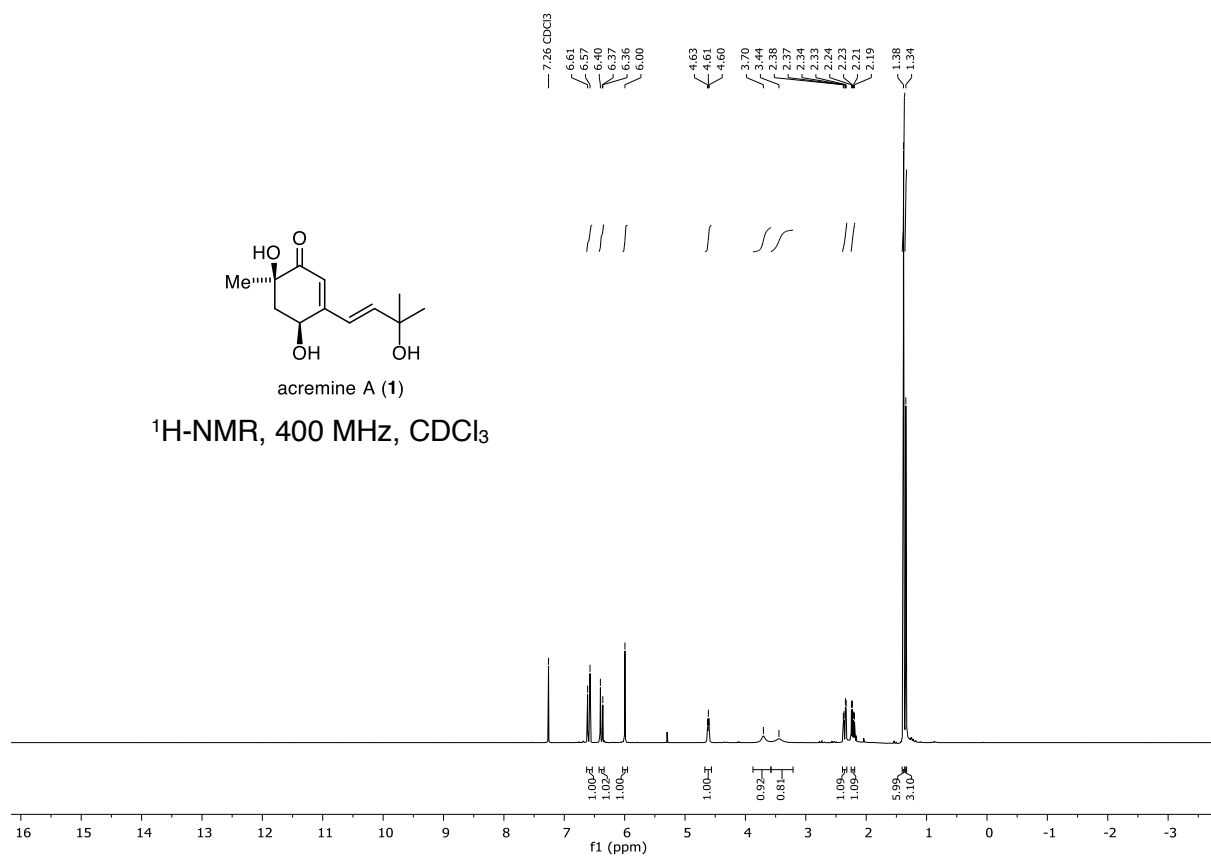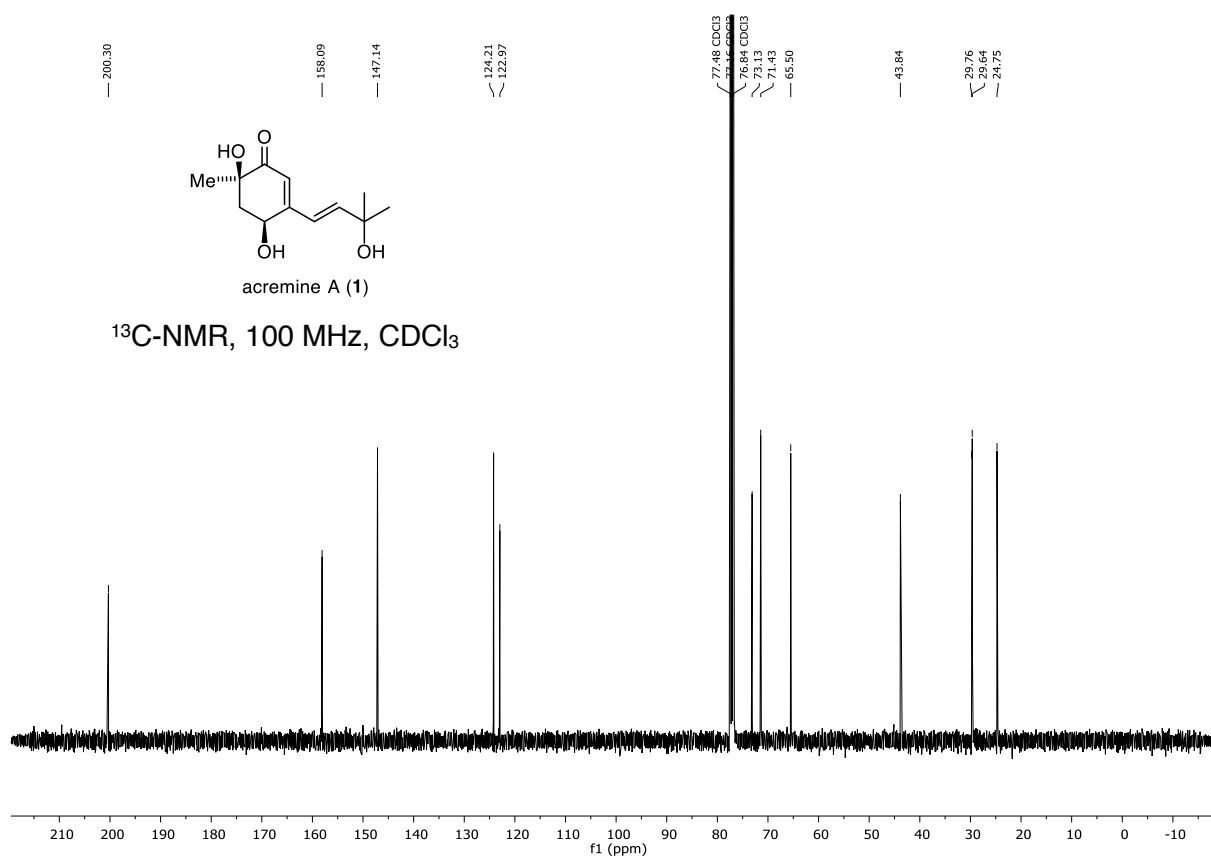

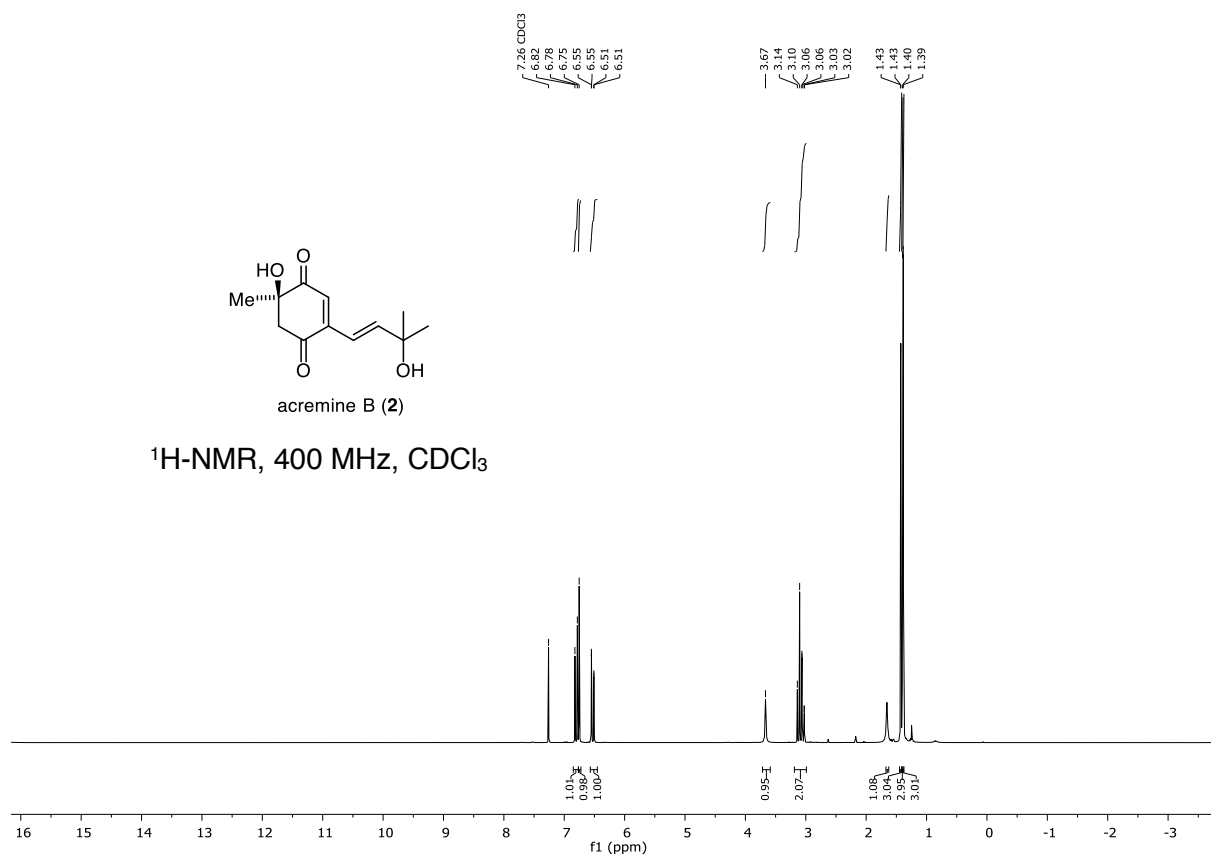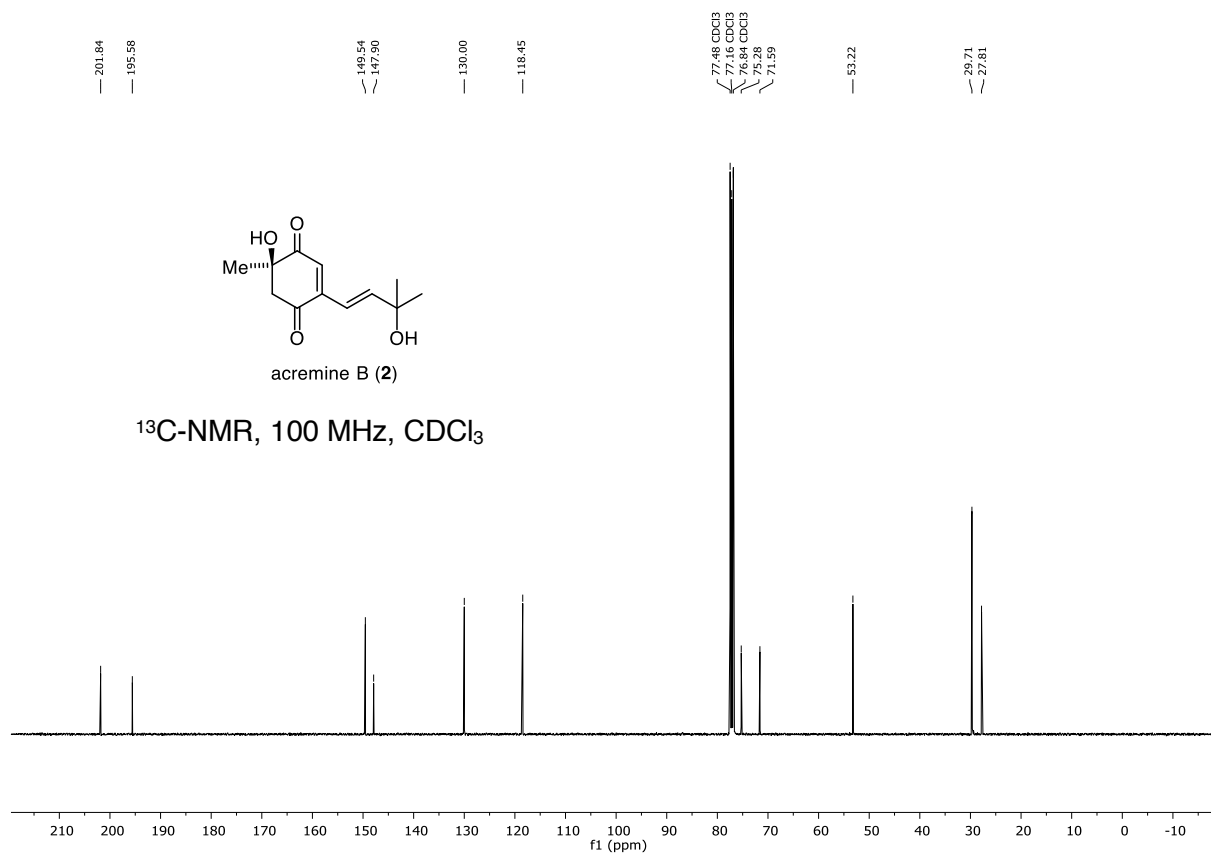

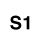

**S1**

<sup>1</sup>H-NMR, 400 MHz, CDCl<sub>3</sub>

Chemical shifts (ppm): 7.26, 6.58, 6.57, 6.52, 4.02, 4.02, 4.01, 4.01, 4.00, 4.00, 4.00, 3.99, 3.99, 3.98, 3.98, 3.97, 3.90, 3.90, 3.89, 3.89, 2.04, 2.04, 2.01, 2.01, 2.01, 2.00, 1.98, 1.98, 1.97, 1.96, 1.95, 1.95, 1.94, 1.93, 1.92, 1.92, 1.91, 1.46, 1.46, 1.37, 1.36, 1.32, 1.32, 0.21, -3.86.

Integration values: 1.00, 1.03, 1.03, 2.16, 3.13, 3.16, 3.23, 9.38.

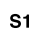

**S1**

$^{13}\text{C}$ -NMR, 100 MHz,  $\text{CDCl}_3$

Chemical structure of **S1** is shown above the spectrum. The structure is a substituted cyclohexene derivative with a methyl group (Me), a trimethylsilyloxy group (OTMS), and a trimethylsilyl ether group (OTMS).

Peak list (ppm):

- 133.76
- 115.55
- 109.96
- 78.48
- 78.41
- 77.48
- 77.43
- 76.89
- 71.16
- 42.71
- 28.66
- 27.59
- 23.77
- 0.55

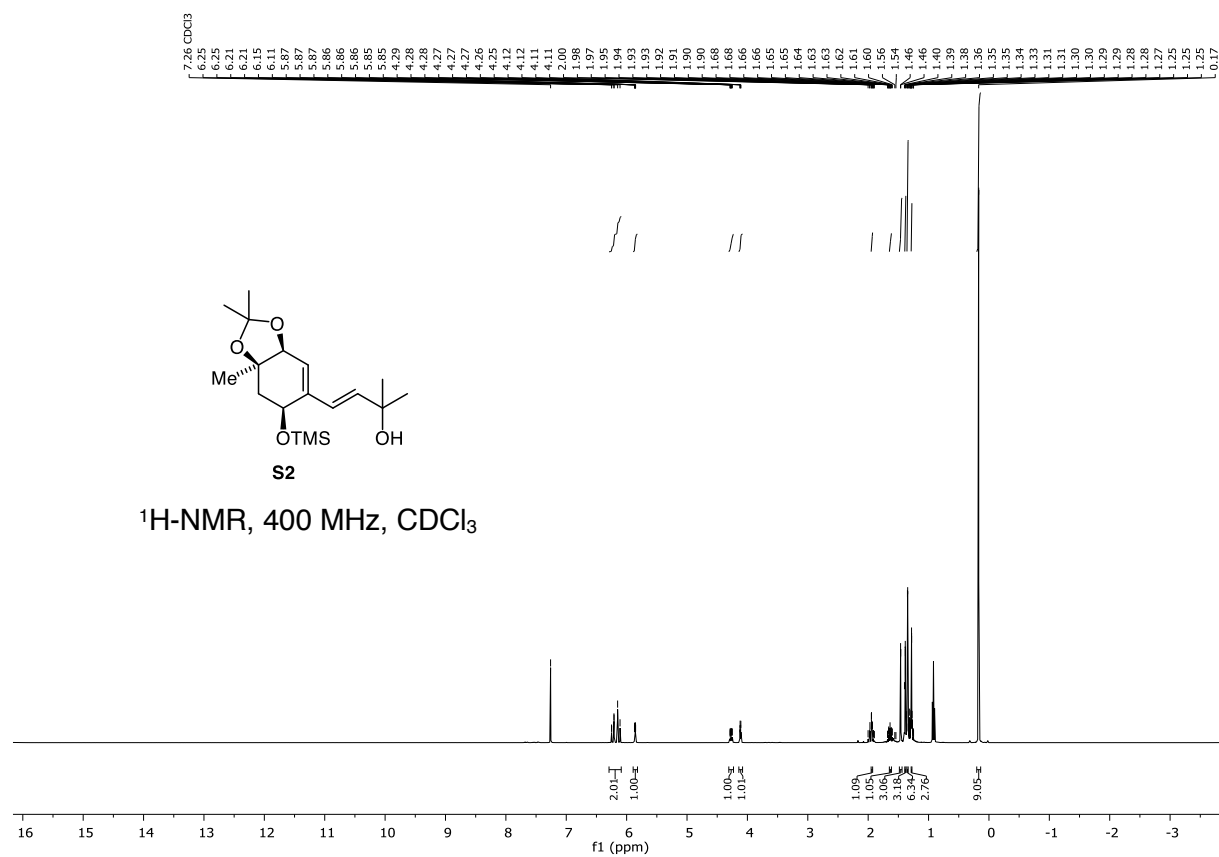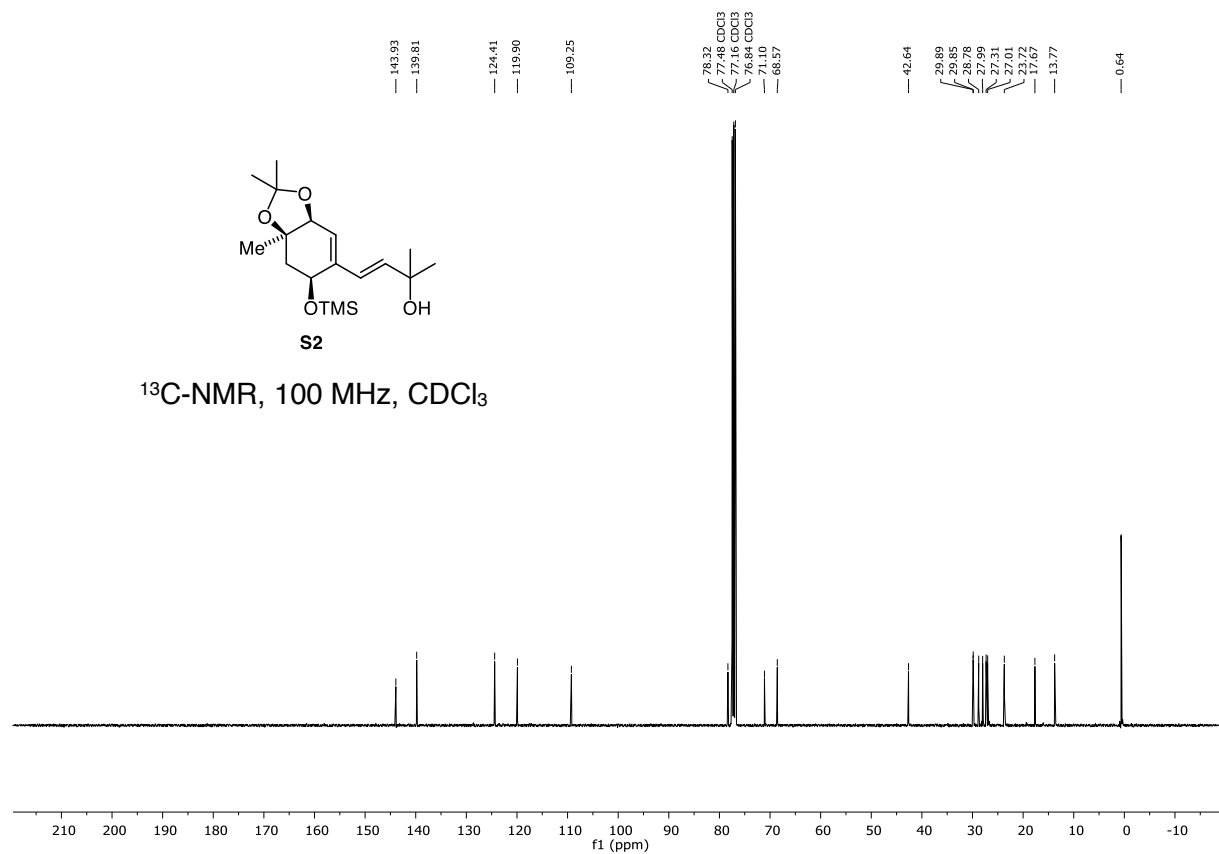

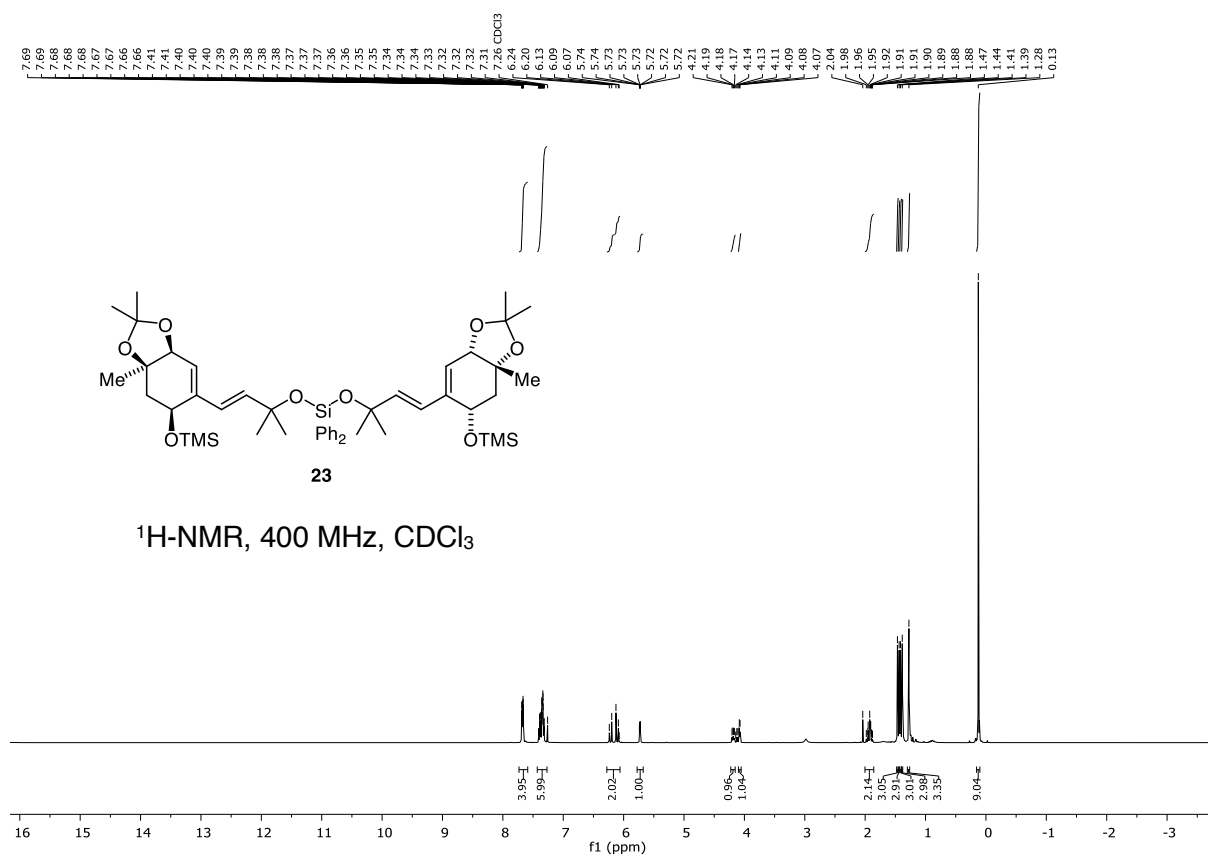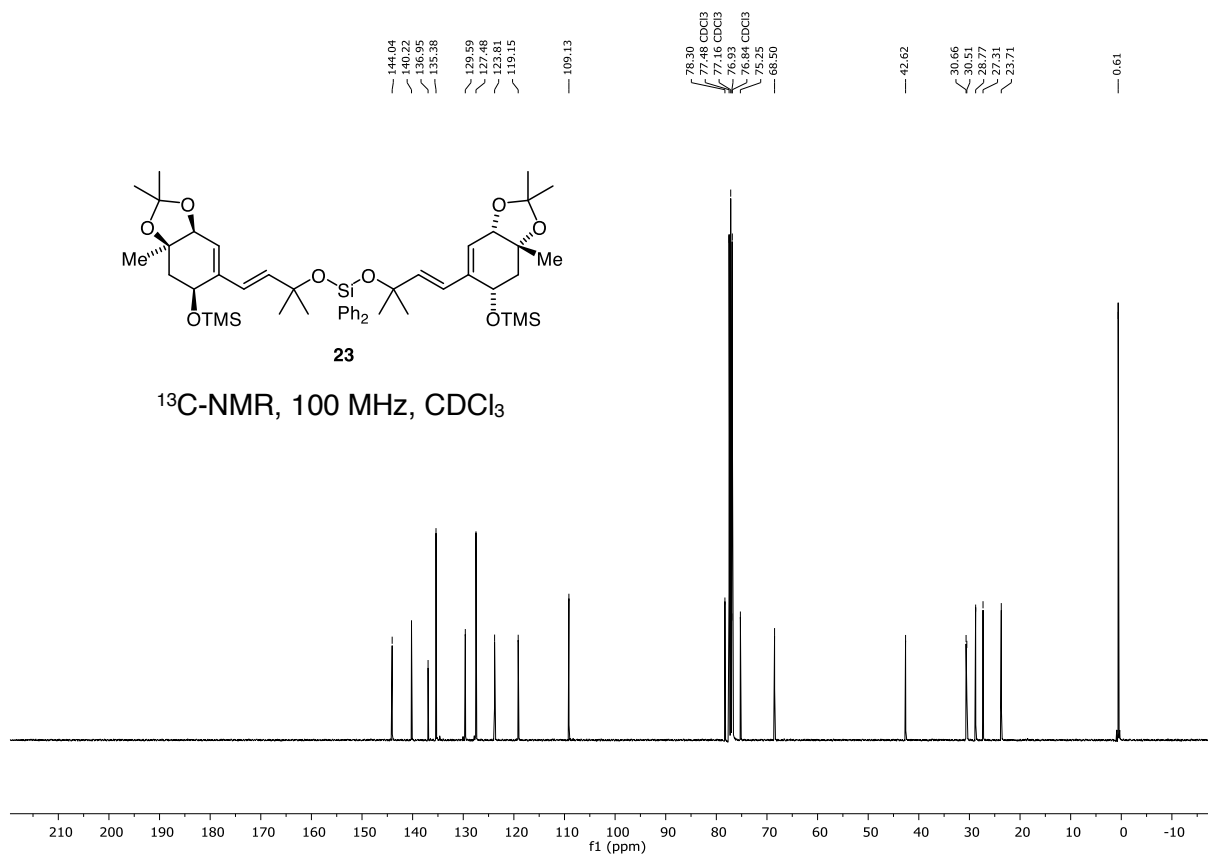

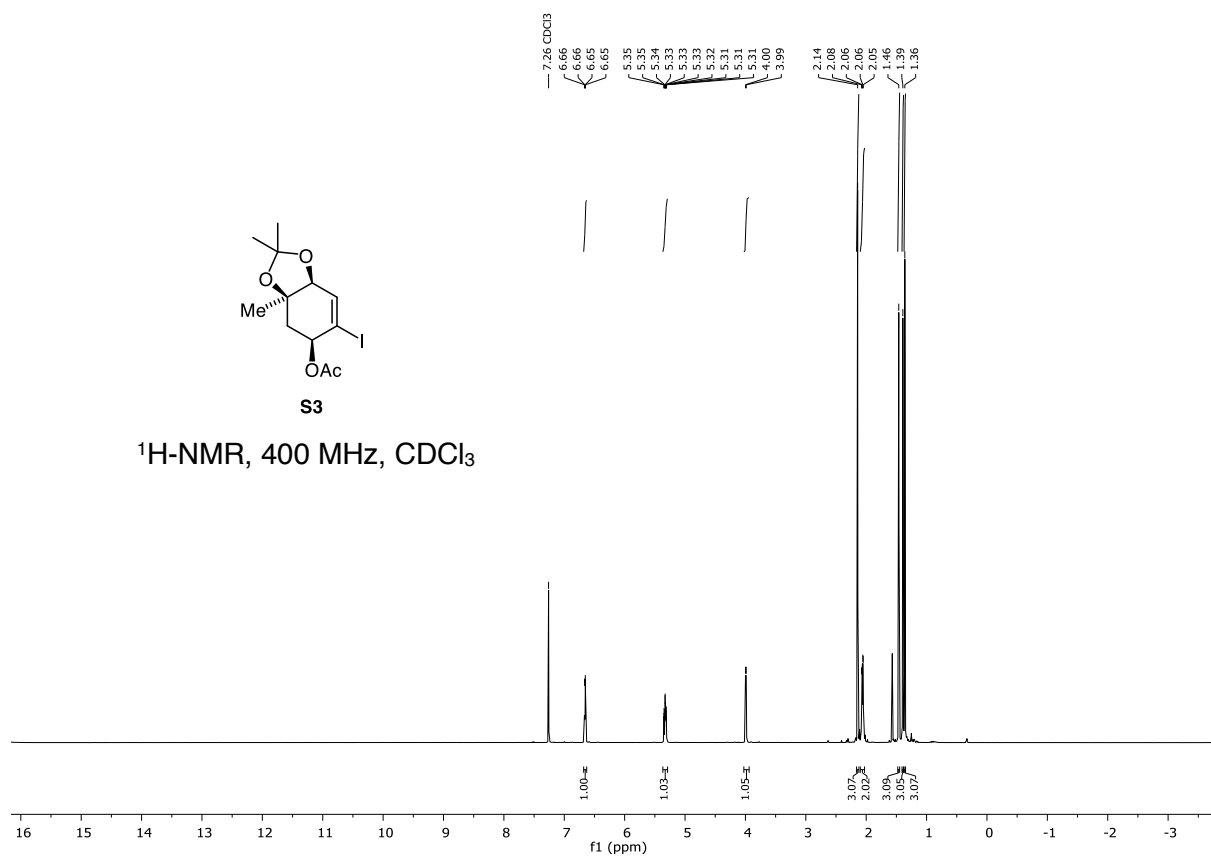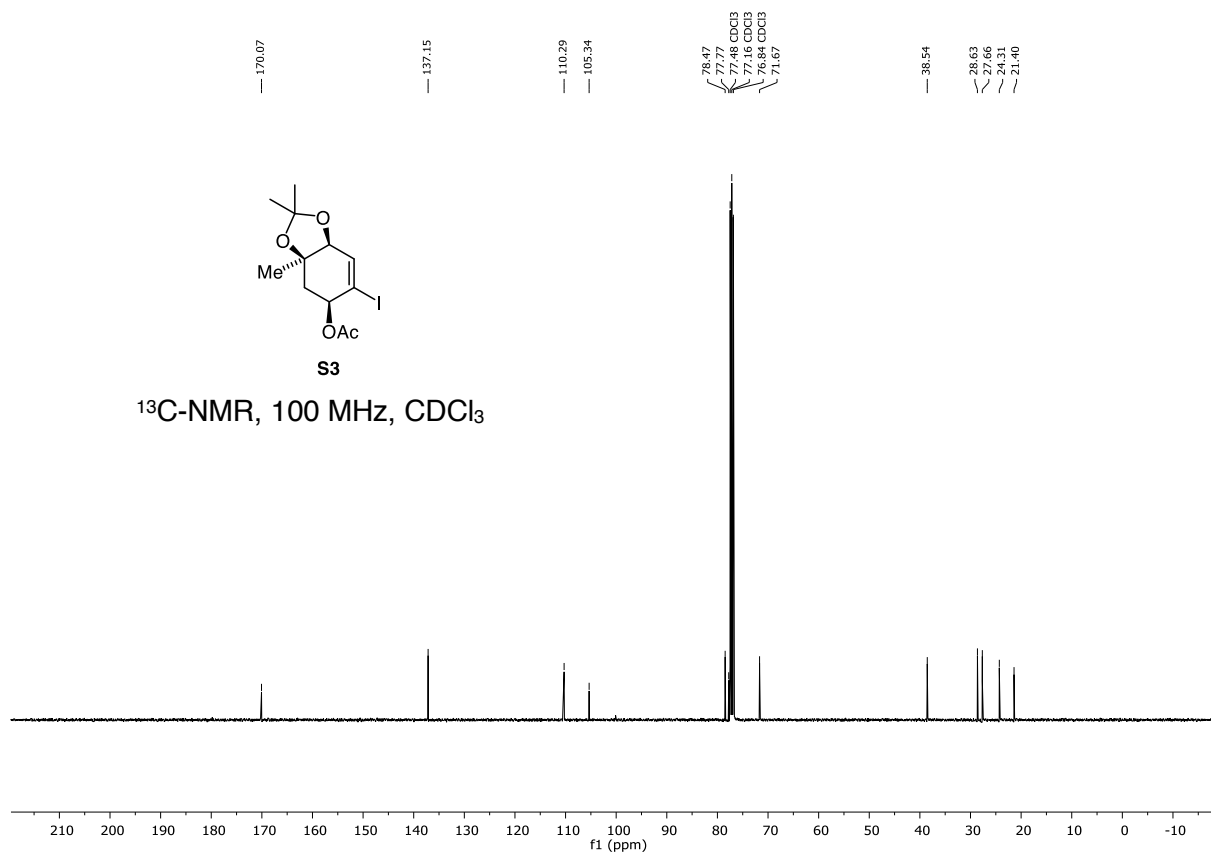



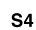

**S4**

$^1\text{H-NMR}$ , 400 MHz,  $\text{CDCl}_3$

Chemical structure of **S4** is shown above the spectrum. It is a cyclohexene derivative with an isopropylidene acetal protecting group, an acetate group, and an iodine atom.

Chemical structure of **S4**: CC(=O)OC[C@H]1C=C[C@@H](C1)C(=O)OC(C)C

Peak list (ppm): 7.26, 6.60, 6.59, 5.45, 5.44, 5.42, 3.82, 3.81, 3.81, 2.18, 2.17, 2.15, 2.14, 2.13, 2.12, 2.10, 2.09, 2.07, 2.05, 1.27.

Integration values: 1.00, 1.01, 1.03, 2.01, 4.18, 1.19, 3.03.

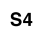

**S4**

$^{13}\text{C}$ -NMR, 100 MHz,  $\text{CDCl}_3$

Chemical structure of **S4**: CC(=O)OC[C@H]1C=C[C@@H](C)[C@H]1C(=O)OC

$^{13}\text{C}$ -NMR peaks (ppm): 169.56, 144.13, 96.96, 77.36, 77.04, 76.72, 73.81, 72.59, 68.76, 39.00, 25.08, 21.14.

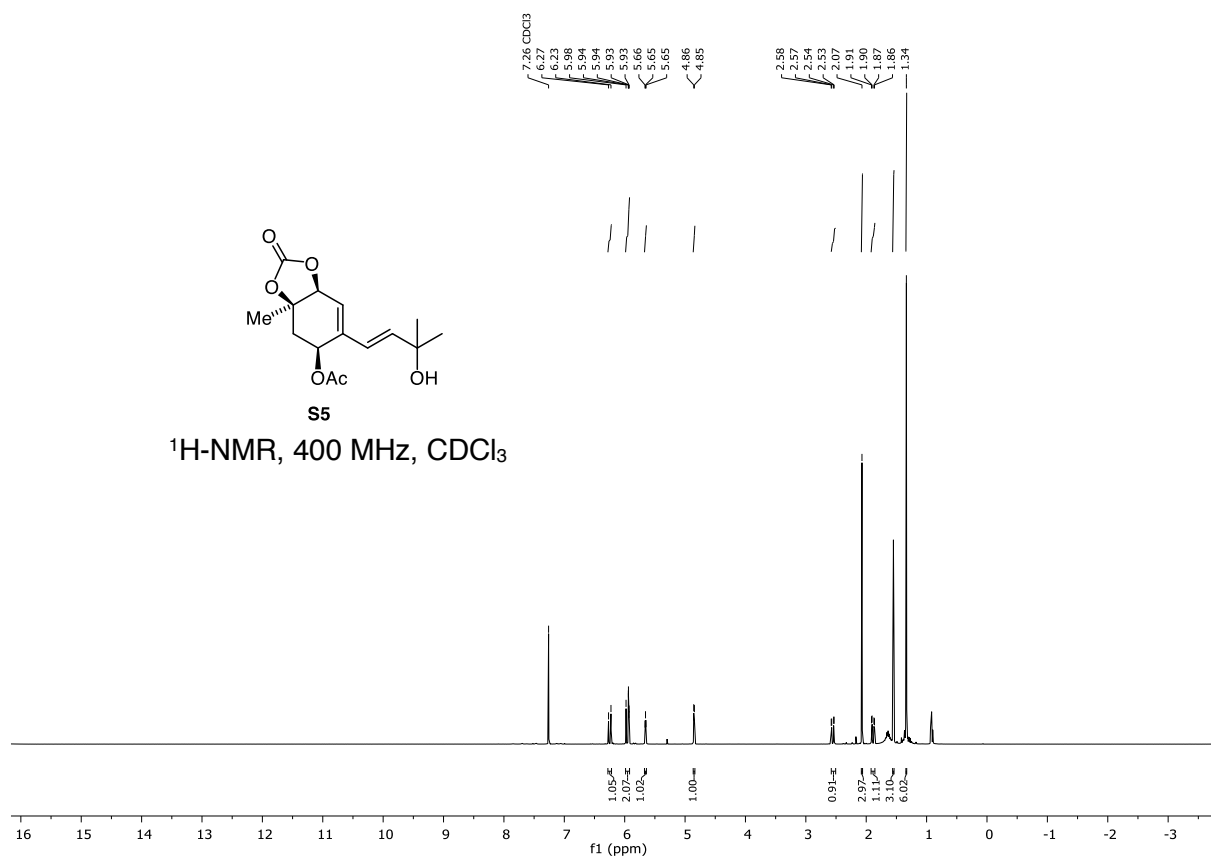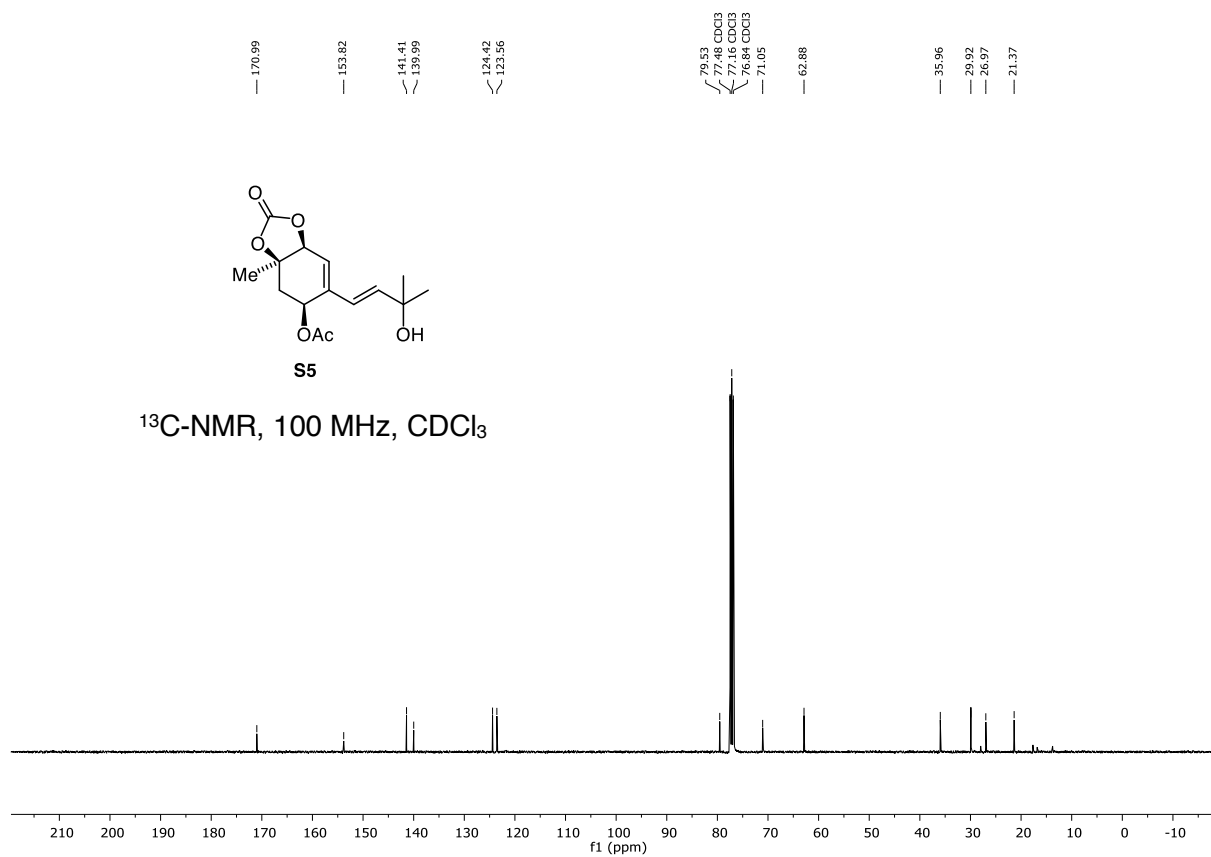

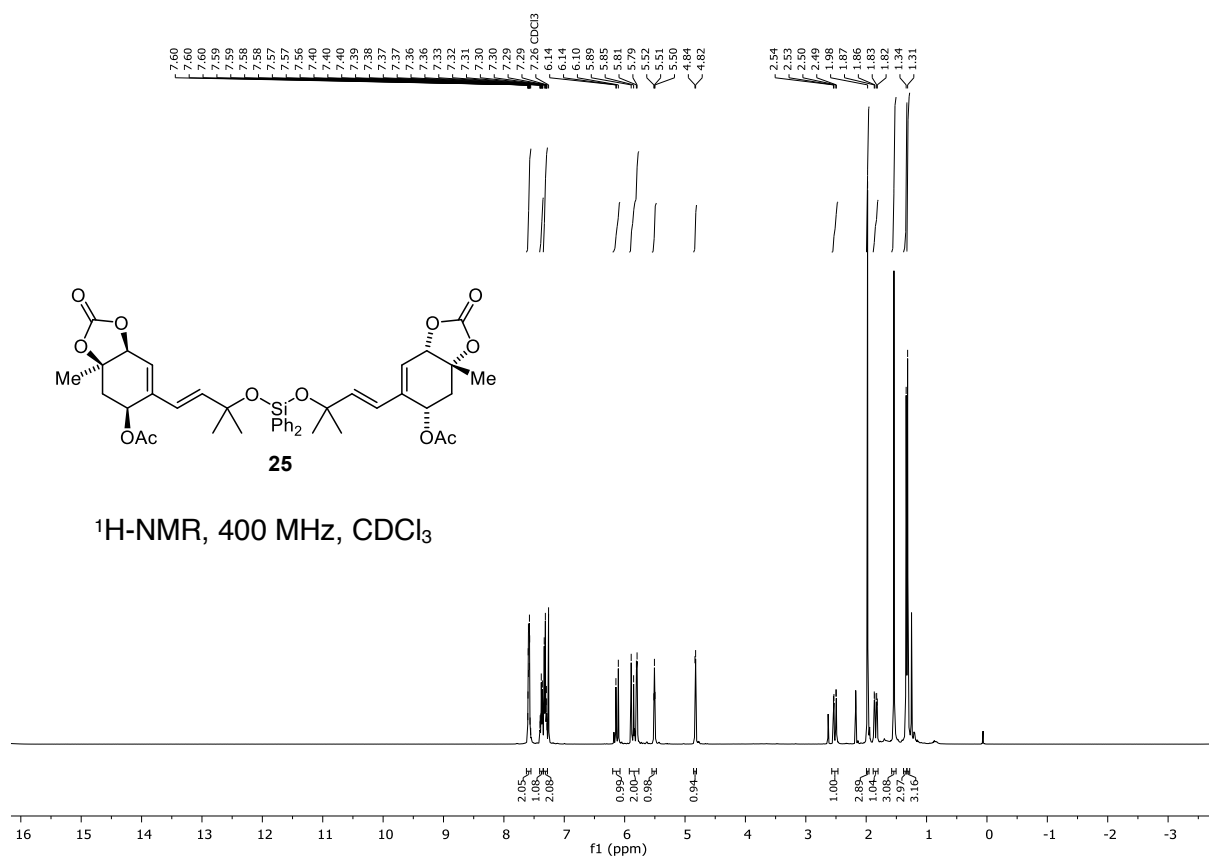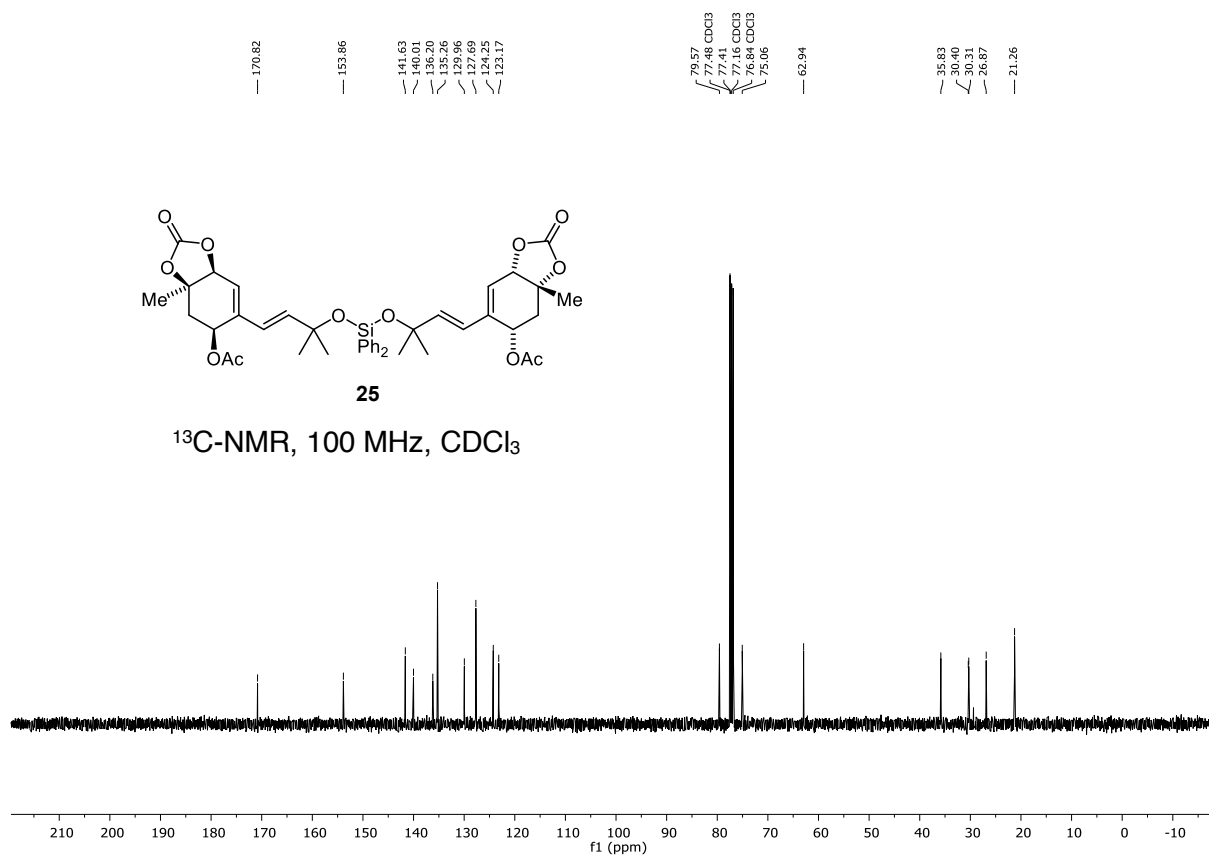

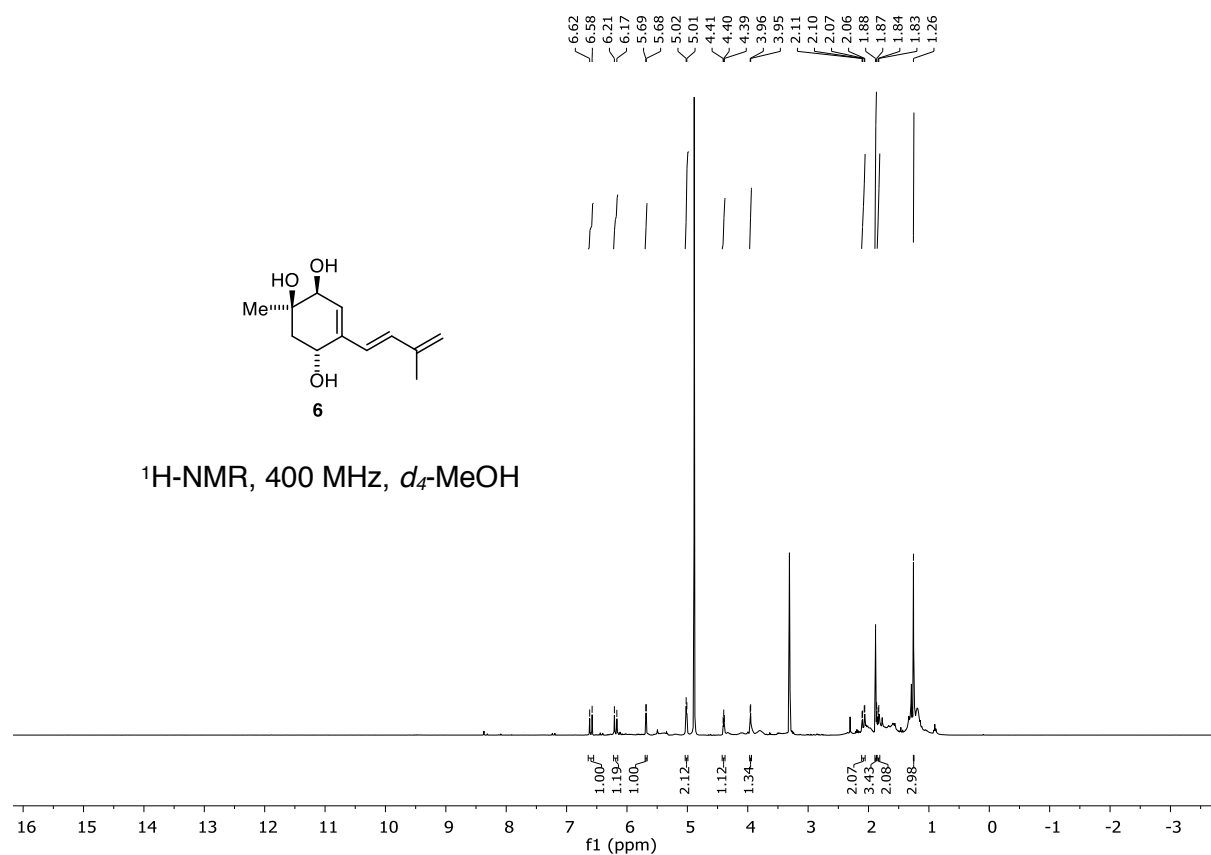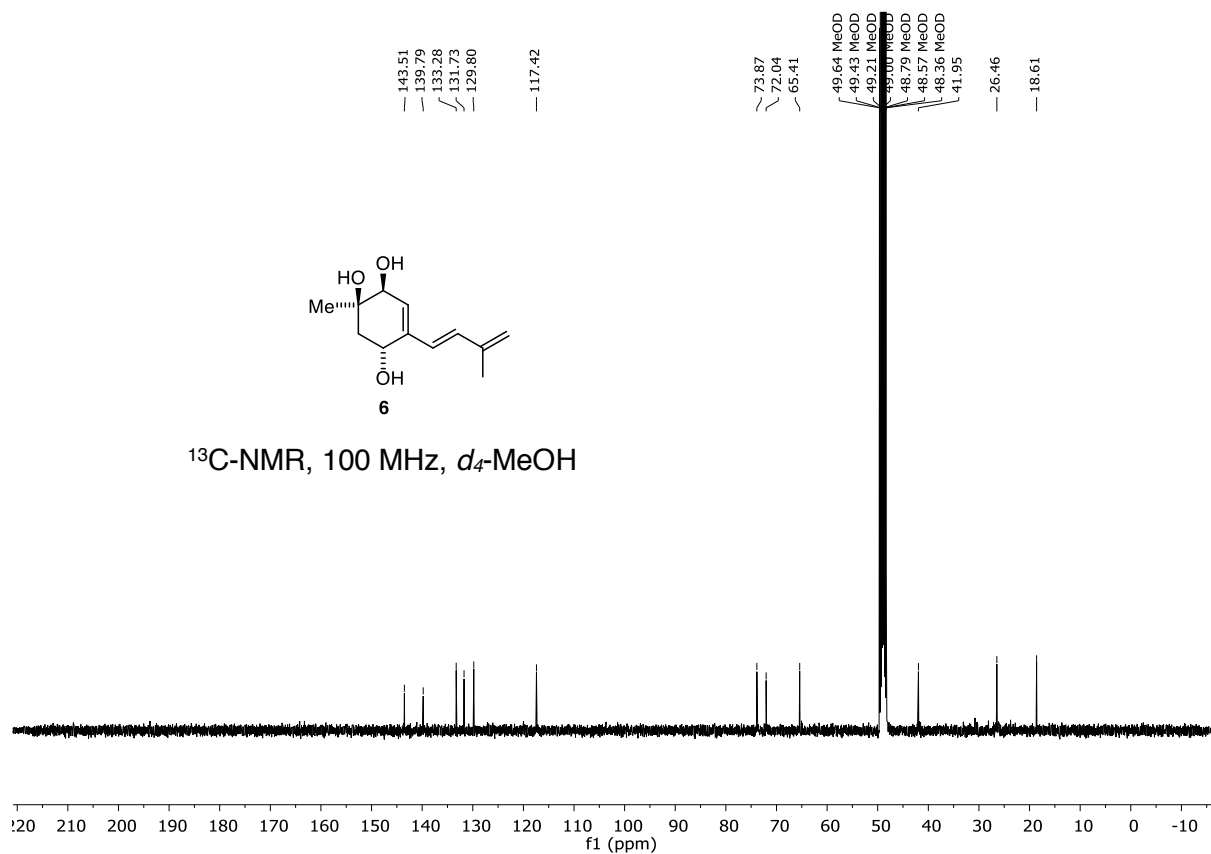

## Crystallographic Data

- Enone 16 (CCDC 1854563)

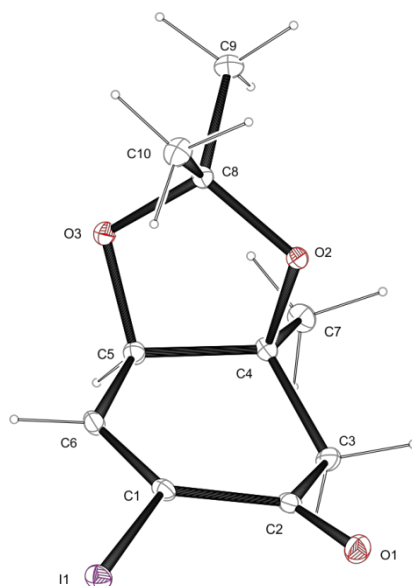

**Figure 1.** ORTEP of the molecular structure of enone **16**.

**Table 4. Crystallographic data for enone 16.**

|                                           |                                                 |
|-------------------------------------------|-------------------------------------------------|
| net formula                               | C <sub>10</sub> H <sub>13</sub> IO <sub>3</sub> |
| <i>M<sub>r</sub></i> /g mol <sup>-1</sup> | 308.10                                          |
| crystal size/mm                           | 0.100 × 0.080 × 0.050                           |
| <i>T</i> /K                               | 100.(2)                                         |
| radiation                                 | MoKα                                            |
| diffractometer                            | 'Bruker D8 Venture TXS'                         |
| crystal system                            | monoclinic                                      |
| space group                               | 'P 1 21/c 1'                                    |
| <i>a</i> /Å                               | 5.5298(4)                                       |
| <i>b</i> /Å                               | 12.2048(10)                                     |
| <i>c</i> /Å                               | 16.1544(12)                                     |
| α/°                                       | 90                                              |
| β/°                                       | 94.678(2)                                       |
| γ/°                                       | 90                                              |
| <i>V</i> /Å <sup>3</sup>                  | 1086.63(14)                                     |
| <i>Z</i>                                  | 4                                               |
| calc. density/g cm <sup>-3</sup>          | 1.883                                           |
| μ/mm <sup>-1</sup>                        | 2.927                                           |
| absorption correction                     | Multi-Scan                                      |
| transmission factor range                 | 0.5958–0.6367                                   |
| refls. measured                           | 20258                                           |
| <i>R</i> <sub>int</sub>                   | 0.0530                                          |
| mean σ( <i>I</i> )/ <i>I</i>              | 0.0329                                          |
| θ range                                   | 3.338–30.501                                    |
| observed refls.                           | 3010                                            |
| <i>x</i> , <i>y</i> (weighting scheme)    | 0.0244, 0.5259                                  |

|                                        |        |
|----------------------------------------|--------|
| hydrogen refinement                    | constr |
| refls in refinement                    | 3298   |
| parameters                             | 130    |
| restraints                             | 0      |
| $R(F_{\text{obs}})$                    | 0.0212 |
| $R_w(F^2)$                             | 0.0561 |
| $S$                                    | 1.043  |
| shift/error <sub>max</sub>             | 0.001  |
| max electron density/e Å <sup>-3</sup> | 0.902  |
| min electron density/e Å <sup>-3</sup> | -0.570 |

• Allylic alcohol 17 (CCDC 1854564)

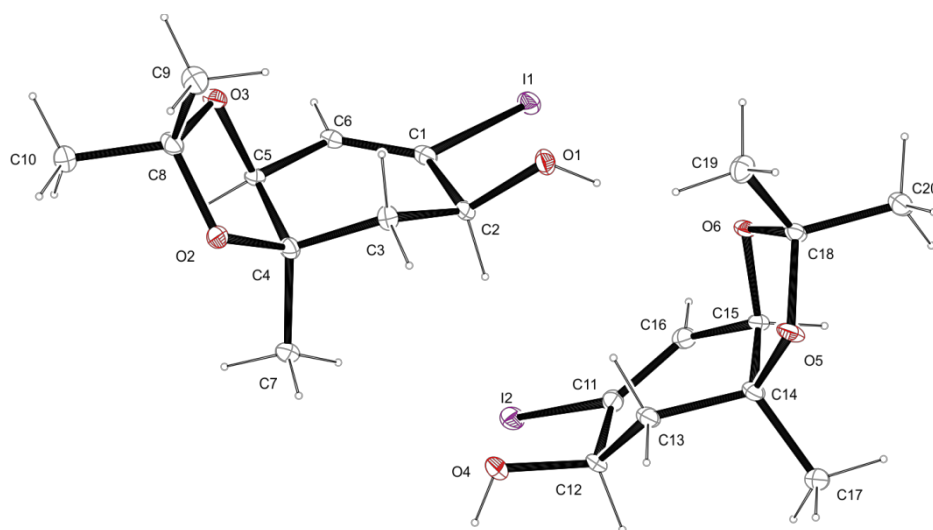

**Figure 2.** ORTEP of the molecular structure of allylic alcohol 17.

**Table 5. Crystallographic data for allylic alcohol 17.**

|                                  |                                                 |
|----------------------------------|-------------------------------------------------|
| net formula                      | C <sub>10</sub> H <sub>15</sub> IO <sub>3</sub> |
| $M_r/\text{g mol}^{-1}$          | 310.12                                          |
| crystal size/mm                  | 0.100 × 0.080 × 0.020                           |
| $T/\text{K}$                     | 100.(2)                                         |
| radiation                        | MoK $\alpha$                                    |
| diffractometer                   | 'Bruker D8 Venture TXS'                         |
| crystal system                   | triclinic                                       |
| space group                      | 'P -1'                                          |
| $a/\text{\AA}$                   | 8.0873(5)                                       |
| $b/\text{\AA}$                   | 12.0960(9)                                      |
| $c/\text{\AA}$                   | 12.4087(9)                                      |
| $\alpha/^\circ$                  | 104.002(2)                                      |
| $\beta/^\circ$                   | 103.200(2)                                      |
| $\gamma/^\circ$                  | 92.314(2)                                       |
| $V/\text{\AA}^3$                 | 1140.79(14)                                     |
| $Z$                              | 4                                               |
| calc. density/g cm <sup>-3</sup> | 1.806                                           |

|                                          |                |
|------------------------------------------|----------------|
| $\mu/\text{mm}^{-1}$                     | 2.788          |
| absorption correction                    | Multi-Scan     |
| transmission factor range                | 0.5733–0.7454  |
| refls. measured                          | 19827          |
| $R_{\text{int}}$                         | 0.0403         |
| mean $\sigma(I)/I$                       | 0.0341         |
| $\theta$ range                           | 3.158–26.372   |
| observed reffs.                          | 4077           |
| x, y (weighting scheme)                  | 0.0417, 0.8914 |
| hydrogen refinement                      | constr         |
| refls in refinement                      | 4630           |
| parameters                               | 261            |
| restraints                               | 0              |
| $R(F_{\text{obs}})$                      | 0.0286         |
| $R_w(F^2)$                               | 0.0756         |
| S                                        | 1.063          |
| shift/error <sub>max</sub>               | 0.001          |
| max electron density/e $\text{\AA}^{-3}$ | 1.314          |
| min electron density/e $\text{\AA}^{-3}$ | –1.036         |

## References

1. Woo, C, M.; Lu, L.; Gholap, S. L.; Smith, D. R.; Herzon, S. B. *J. Am. Chem. Soc.*, **2010**, *132*, 2540–2541.
2. Assante, G.; Dallavalle, S.; Malpezzi, L.; Nasini, G.; Burruanod, S.; Tortad, L. *Tetrahedron*, **2005**, *61*, 7686–7692.
3. Suciati; Fraser, J. A.; Lambert, L. K.; Pierens, G. K.; Bernhardt, P. V.; Garson, M. J. *J. Nat. Prod.*, **2013**, *76*, 1432–1440.
4. Wu, P.; Yao, L.; Xu, L.; Xue, L.; Wie, X. *J. Nat. Prod.* **2015**, *78*, 2161–2166.
